# Supplementary material for: Switching from positive to negative axial thermal expansion in two organic crystalline compounds with similar packing
Source: Royal Society of Chemistry journal article supplement (doi:10.1039/c8cc05859h), 2018-01-01
Supplement: c8cc05859h1.pdf [file c8cc05859h1.pdf]

## Electronic Supplementary Information (ESI)

# Switching from positive to negative axial thermal expansion in two organic crystalline compounds with similar packing

Lalita Negi,<sup>a</sup> Ashutosh Shrivastava<sup>a</sup> and Dinabandhu Das<sup>\*a</sup>

<sup>a</sup>School of Physical Sciences, Jawaharlal Nehru University, New Delhi-110067, India.

*Email: jnu.dinu@gmail.com.*

## Table of Content

### 1. Synthesis of compounds 1 and 2

**Figure S1.** <sup>1</sup>H-NMR spectra of compound **1**.

**Figure S2.** <sup>13</sup>C-NMR Spectra of compound **1**.

**Figure S3.** <sup>1</sup>H-NMR spectra of compound **2**.

**Figure S4.** <sup>13</sup>C-NMR Spectra of compound **2**.

### 2. Differential Scanning Calorimetric study.

**Figure S5a.** DSC thermogram of **1**.

**Figure S5b.** DSC thermogram of **2**.

### 3. Variable temperature Single Crystal X-ray Diffraction.

**Figure S6.** Molecular stacking of (a) **1** and (b) **2** in the crystal structure.

**Figure S7.** Packing diagram of (a) **1** and (b) **2** showing hydrogen bonding interactions.

**Figure S8.** Packing diagram showing C-H··· $\pi$  interactions between the molecules in the crystal structure of (a) **1** and (b) **2**.

**Table S1.** Basic crystallographic data and refinement conditions for **1**.

**Table S2.** Basic crystallographic data and refinement conditions for **2**.

**Table S3.** Change of Unit cell parameters in **1** with temperature.

**Table S4.** Change of Unit cell parameters in **2** with temperature.

**Figure S9:** Representation of molecular length ( $x$ ) between C2-C13 in **1** and C2-C17 in **2** and tilt angle  $\theta_1$  and  $\theta_2$  in **1** and **2**.

**Table S5.** Change of Distance between **C2-C13** in **1** at with temperature.

**Table S6.** Change of Distance between **C2-C17** in **2** at with temperature.

**Table S7.** Change of tilt angle ( $\theta_1$  and  $\theta_2$ ) with temperature for compound **1**.

**Table S8.** Change of tilt angle ( $\theta_1$  and  $\theta_2$ ) with temperature for compound **2**.

**Table S9.** Change of Hydrogen bonding parameters in compound **1** with Temperature.

**Table S10.** Change of Hydrogen bonding parameters in compound **2** with Temperature.

#### **4. Powder X-ray Diffraction**

**Figure S10.** Powder X-ray Diffractogram of compound **1**.

**Figure S11.** Powder X-ray Diffractogram of compound **2**.

#### **5. Variation of Atomic Displacement Parameters ( $U_{11}$ , $U_{22}$ and $U_{33}$ ) of carbon atoms with Temperature for compound **1** and **2**.**

**Figure S12.** Plot of ADPs ( $U_{11}$ ,  $U_{22}$  and  $U_{33}$ ) of carbon atoms of compound **1** with temperature.

**Figure S13.** Plot of ADPs ( $U_{11}$ ,  $U_{22}$  and  $U_{33}$ ) of carbon atoms of compound **2** with temperature.

#### **6. Thermal Ellipsoid Plot of **1** and **2** at variable temperatures.**

**Figure S14.** Thermal ellipsoid plot of compound **1** at different temperature.

**Figure S15.** Thermal ellipsoid plot of compound **2** at different temperature.

#### **7. References.**

## 1. Synthesis of compounds 1 and 2

All chemicals were of reagent grade and were used without further purification.

Compound **1** and **2** were synthesized by a procedure already reported in literature.<sup>1</sup> To a three-necked round bottomed flask (100 ml) connected with Schlenk line, 1,4-diiodobenzene (500 mg for Compound **1**)/ 2,6-dibromonaphthalene (434 mg for compound **2**) (1.52 mmol), Pd(PPh<sub>3</sub>)<sub>2</sub>Cl<sub>2</sub> (21.05 mg, 0.03 mmol), CuI (11.61mg, 0.061mmol) and 25 ml triethylamine were added under inert atmosphere and stirred. *S*-(-)-3-butyn-2-ol (0.314 ml, 4 mmol) was added dropwise to a clear solution. The reaction mixture was refluxed overnight under N<sub>2</sub> atmosphere. After cooling to room temperature, solvent was evaporated under vacuum and obtained product was washed with NH<sub>4</sub>Cl and brine. Residue was purified by column chromatography using ethyl acetate and hexane as eluent. The isolated products **1** and **2** were recrystallized using CHCl<sub>3</sub> and ethyl acetate respectively. Colorless block shaped crystals of **1** and hexagonal prism shaped crystals of **2** were obtained after slow evaporation of solvent. Molecular structures were characterized by <sup>1</sup>H and <sup>13</sup>C NMR spectroscopy.

<sup>1</sup>H-NMR of **1** (500MHz, DMSO-d<sub>6</sub>): δ=7.39 (s, 4H), 5.51 (d, 2H), 4.60 (m, 2H), 1.38 (d, 6H).

<sup>13</sup>CNMR of **1** (125 MHz, DMSO-d<sub>6</sub>): δ= 24.98, 57.14, 82.11, 95.70, 122.80, 131.85.

<sup>1</sup>H-NMR of **2** (500MHz, DMSO-d<sub>6</sub>): δ= 8.04 (s, 2H), 7.92 (d, 2H), 7.50 (d, 2H), 5.55 (d, 2H), 4.65 (m, 2H), 1.42 (d, 6H).

<sup>13</sup>C-NMR of **2** (125 MHz, DMSO-d<sub>6</sub>): δ= 25.06, 57.21, 94.95, 121.12, 128.57, 129.31, 131.18, 132.33.

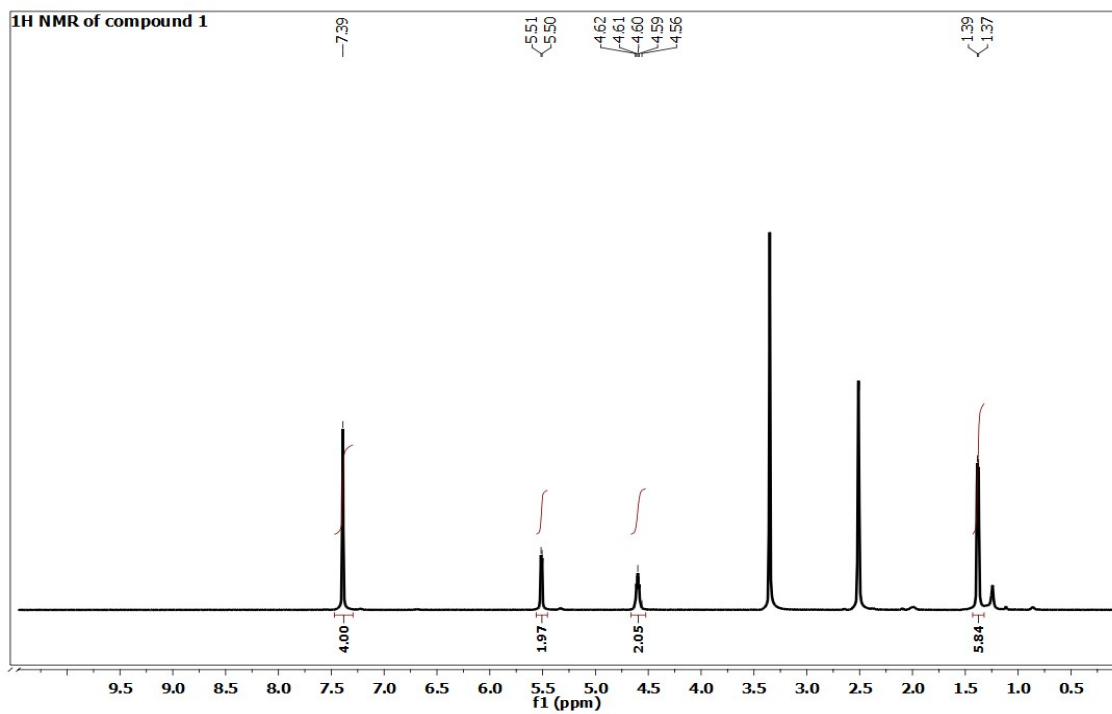

**Figure S1.** <sup>1</sup>H NMR spectrum of compound 1

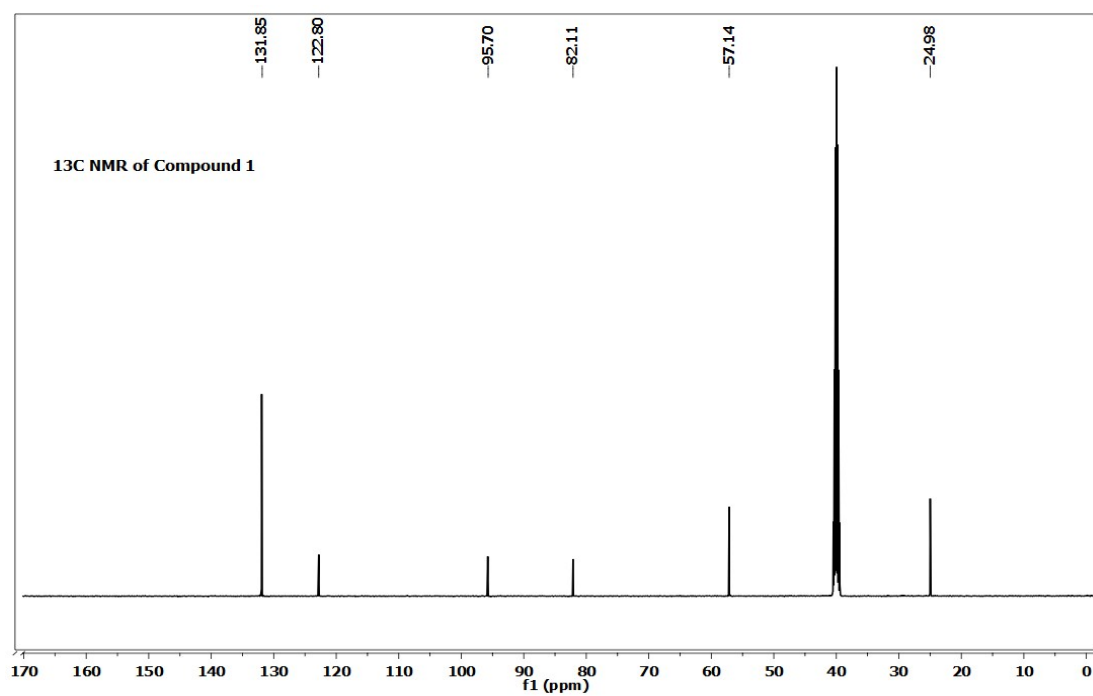

**Figure S2.** <sup>13</sup>C NMR Spectrum of compound 1.

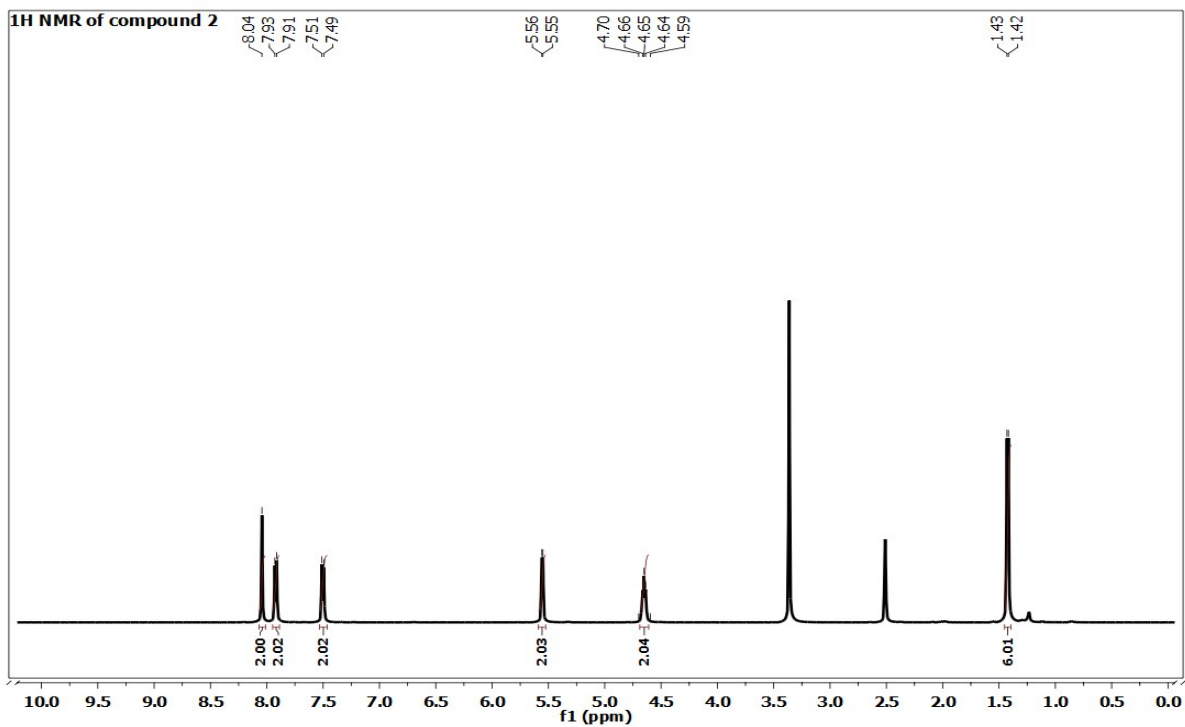

**Figure S3.** <sup>1</sup>H NMR Spectra of compound 2.

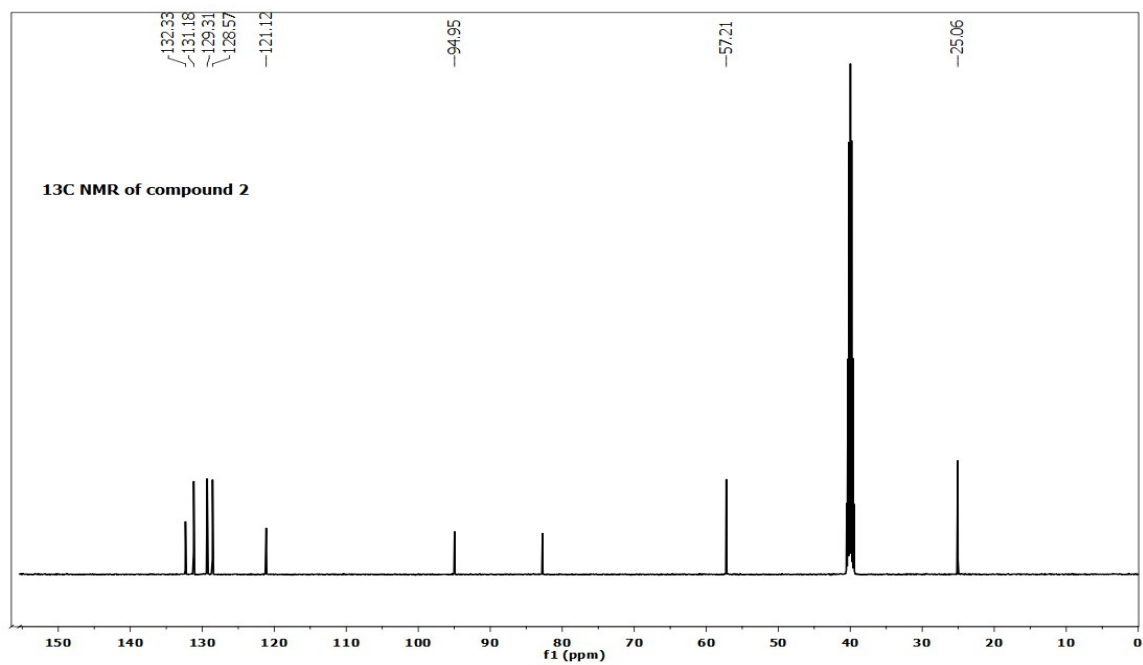

**Figure S4.** <sup>13</sup>C NMR spectrum of compound 2.

## 2. Differential Scanning Calorimetry

Differential scanning calorimetric measurements of **1** & **2** were carried out of pure crystalline powdered samples using Mettler-Toledo DSC1 instrument. Approximately 3 to 5 mg of each sample was sealed in aluminium pan and covered with a pierced lid. The samples were heated at the rate of 5 °C/ min from 25 °C to 160 °C in case of **1** and 25 °C to 200 °C for **2** under flow of N<sub>2</sub> gas with the rate of 40ml/min.

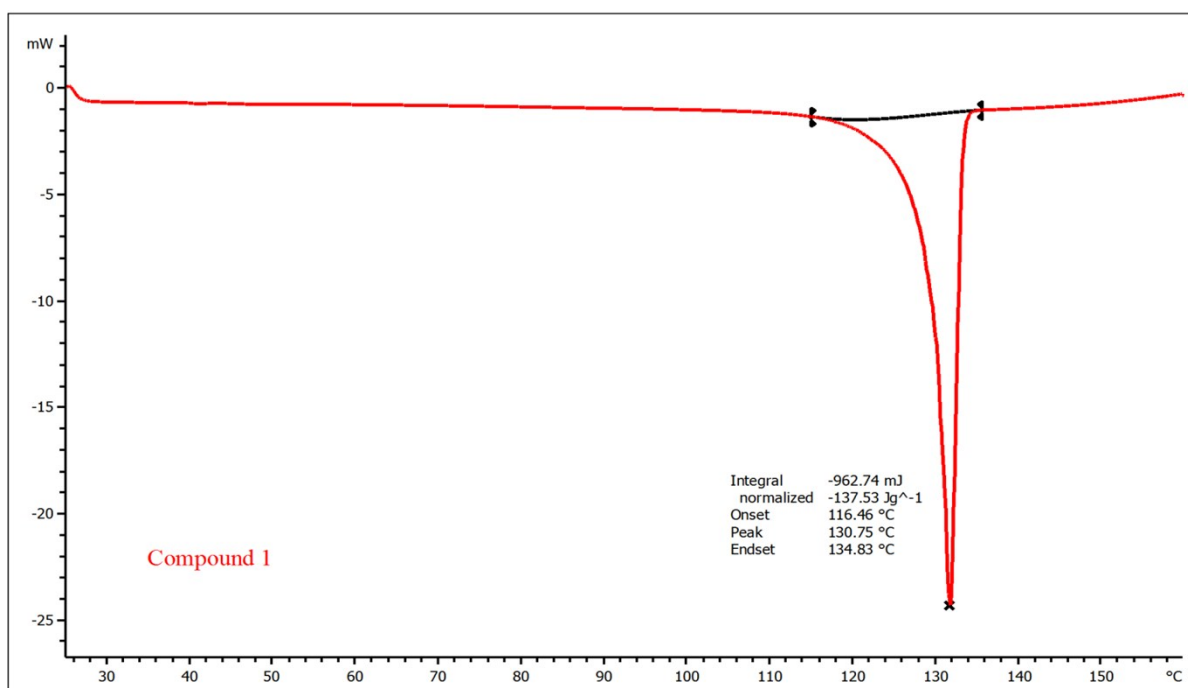

**Figure S5a.** DSC thermogram shows melting of **1** at 130.75 °C with an onset temperature of 116.46 °C.

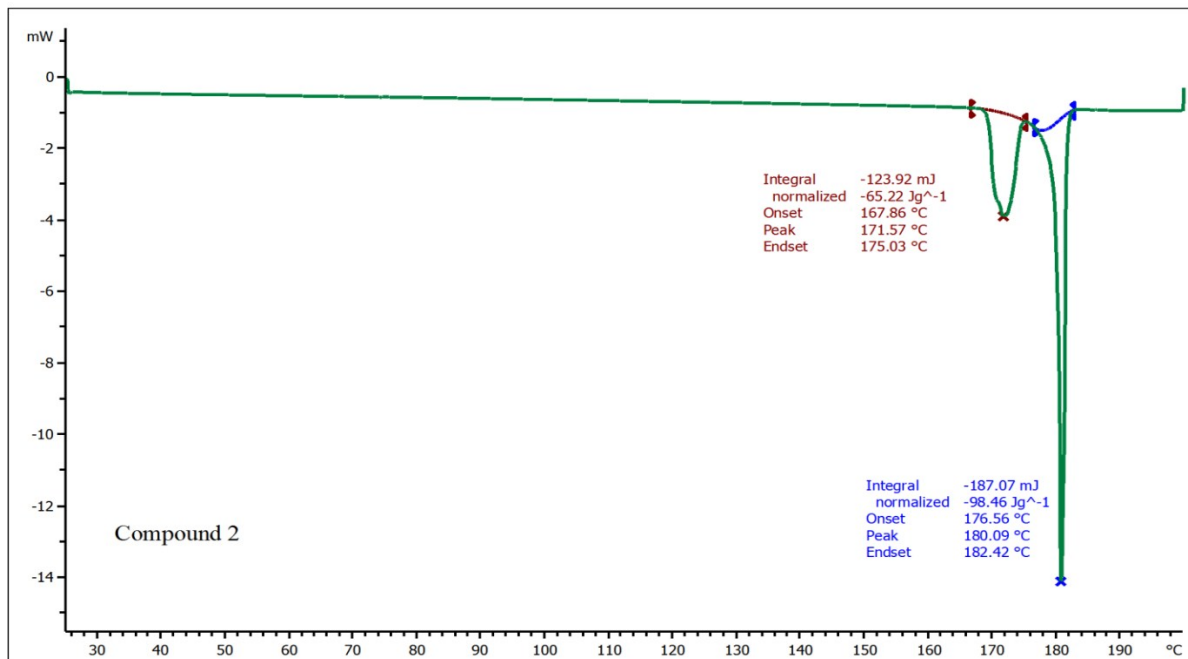

**Figure S5b.** DSC thermogram of compound **2** shows small endothermic peak at 171.57 °C followed by melting at 180.09 °C. Variable temperature SCD experiment has been performed till 127 °C.

### 3. Variable Temperature Single Crystal X-ray Diffraction

Single-crystal X-ray data for the compound **1** and **2** in this study were collected on Bruker D8 Quest single crystal X-ray diffractometer equipped with a microfocus anode (MoK<sub>α</sub>) and a PHOTON 100 CMOS detector. The data were integrated and scaled using the Bruker suite of programs.<sup>2</sup> The structures at each temperature were solved by direct methods and refined by full-matrix least-squares on F<sup>2</sup> using SHELX-2014.<sup>3</sup> All non-hydrogen atoms were refined anisotropically and all the aromatic hydrogen atoms were placed using calculated positions on riding models. Position of all the hydrogen atoms of hydroxyl groups were assigned using Difference Fourier map. Crystallographic data and final refinement details for the compound **1** and **2** are given in Table **S1** and **S2** respectively.

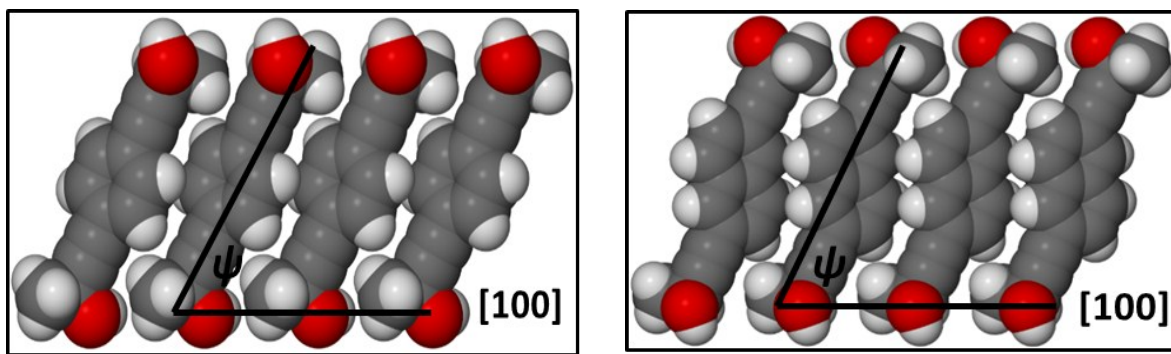

(a)

(b)

**Figure S6.** Molecular stacking of (a) **1** and (b) **2**. Both molecules are tilted with an angle  $\psi$ , relative to [100] direction.

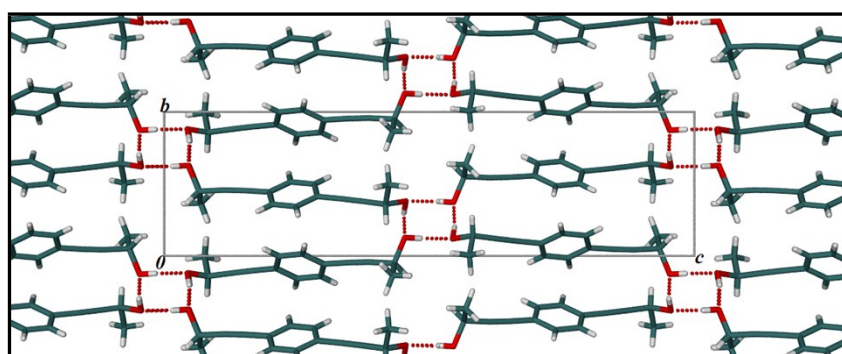

(a)

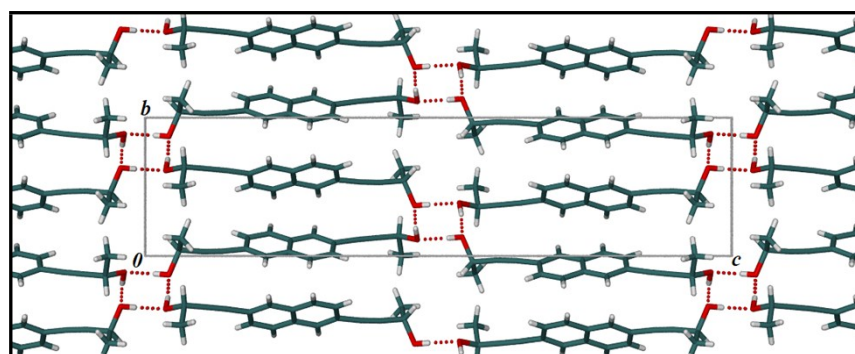

(b)

**Figure S7.** Packing diagram of (a) **1** and (b) **2**, viewed down the  $a$  axis. Hydrogen bonding is shown by the red dotted lines.



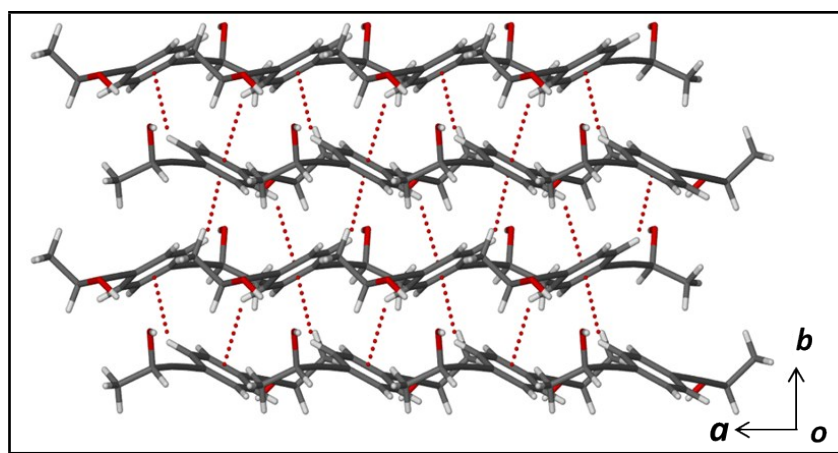

(a)

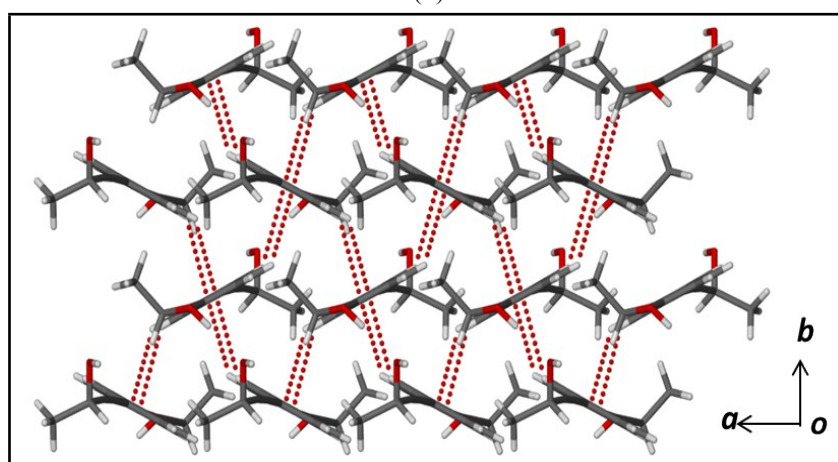

(b)

**Figure S8.** Packing diagram showing C-H $\cdots$  $\pi$  interactions between the molecules in the crystal structure of (a) **1** and (b) **2** viewed down  $c$  axis.

**Table S1.** Crystallographic data and refinement parameters for **1**

| Compound          | <b>1_90K</b>                                   | <b>1_120K</b>                                  | <b>1_150K</b>                                  | <b>1_180K</b>                                  | <b>1_210K</b>                                  | <b>1_240K</b>                                  | <b>1_270K</b>                                  |
|-------------------|------------------------------------------------|------------------------------------------------|------------------------------------------------|------------------------------------------------|------------------------------------------------|------------------------------------------------|------------------------------------------------|
| Empirical formula | C <sub>14</sub> H <sub>14</sub> O <sub>2</sub> |
| Crystal system    | orthorhombic                                   |
| Space group       | $P 2_1 2_1 2_1$                                |
| T (K)             | 90(2)                                          | 120(2)                                         | 150(2)                                         | 180(2)                                         | 210(2)                                         | 240(2)                                         | 270(2)                                         |
| $a$ (Å)           | 5.6838(4)                                      | 5.6861(4)                                      | 5.6883(4)                                      | 5.6915(5)                                      | 5.6944(5)                                      | 5.6982(5)                                      | 5.7057(5)                                      |
| $b$ (Å)           | 7.3834(4)                                      | 7.4078(5)                                      | 7.4343(5)                                      | 7.4628(5)                                      | 7.4936(6)                                      | 7.5247(6)                                      | 7.5595(6)                                      |
| $c$ (Å)           | 28.139(2)                                      | 28.140(2)                                      | 28.140(2)                                      | 28.143(3)                                      | 28.143(3)                                      | 28.143(3)                                      | 28.152(3)                                      |
| $\alpha$ (deg)    | 90                                             | 90                                             | 90                                             | 90                                             | 90                                             | 90                                             | 90                                             |
| $\beta$ (deg)     | 90                                             | 90                                             | 90                                             | 90                                             | 90                                             | 90                                             | 90                                             |

|                                          |                                            |                                            |                                            |                                            |                                            |                                             |                                             |
|------------------------------------------|--------------------------------------------|--------------------------------------------|--------------------------------------------|--------------------------------------------|--------------------------------------------|---------------------------------------------|---------------------------------------------|
| $\gamma$ /(deg)                          | 90                                         | 90                                         | 90                                         | 90                                         | 90                                         | 90                                          | 90                                          |
| Volume/ $\text{\AA}^3$                   | 1180.88(14)                                | 1185.30(14)                                | 1190.00(14)                                | 1195.37(17)                                | 1200.89(18)                                | 1206.69(19)                                 | 1214.24(18)                                 |
| Z                                        | 4                                          | 4                                          | 4                                          | 4                                          | 4                                          | 4                                           | 4                                           |
| $D_{\text{cal}}$ /g cm <sup>-3</sup>     | 1.205                                      | 1.201                                      | 1.196                                      | 1.190                                      | 1.185                                      | 1.179                                       | 1.172                                       |
| $\mu$ /mm <sup>-1</sup>                  | 0.080                                      | 0.079                                      | 0.079                                      | 0.079                                      | 0.078                                      | 0.078                                       | 0.077                                       |
| $F_{000}$                                | 456                                        | 456                                        | 456                                        | 456                                        | 456                                        | 456                                         | 456                                         |
| Crystal size/<br>mm <sup>3</sup>         | 0.222×0.096×<br>0.077                      | 0.222×0.096×<br>0.077                      | 0.222×0.096×<br>0.077                      | 0.222×0.096×<br>0.077                      | 0.222×0.096×<br>0.077                      | 0.222×0.096<br>×0.077                       | 0.222×0.096×<br>0.077                       |
| Radiation                                | 0.71073                                    | 0.71073                                    | 0.71073                                    | 0.71073                                    | 0.71073                                    | 0.71073                                     | 0.71073                                     |
| $\theta$ range for<br>data<br>collection | 2.852-28.292                               | 2.843- 28.299                              | 2.834- 28.305                              | 2.824- 28.298                              | 2.813- 28.318                              | 2.802-<br>28.351                            | 2.790-28.342                                |
| Index<br>ranges                          | -7 ≤ h ≤ 7; -9 ≤<br>k ≤ 9; -34 ≤ l<br>≤ 37 | -7 ≤ h ≤ 7; -9 ≤<br>k ≤ 9; -34 ≤ l<br>≤ 37 | -7 ≤ h ≤ 7; -9 ≤<br>k ≤ 9; -34 ≤ l<br>≤ 37 | -7 ≤ h ≤ 7; -9 ≤<br>k ≤ 9; -34 ≤ l<br>≤ 37 | -7 ≤ h ≤ 7; -9 ≤<br>k ≤ 9; -37 ≤ l<br>≤ 34 | -7 ≤ h ≤ 7; -9<br>≤ k ≤ 10; -37<br>≤ l ≤ 34 | -7 ≤ h ≤ 7; -9 ≤<br>k ≤ 10; -37 ≤ l<br>≤ 34 |
| No. of<br>measured<br>reflections        | 12631                                      | 12587                                      | 12671                                      | 12778                                      | 13087                                      | 13197                                       | 13376                                       |
| No. of<br>independent<br>reflections     | 2922                                       | 2935                                       | 2951                                       | 2977                                       | 2988                                       | 3010                                        | 3030                                        |
| No. of<br>observed<br>reflections        | 2481                                       | 2386                                       | 2301                                       | 2164                                       | 2051                                       | 1885                                        | 1746                                        |
| parameters                               | 156                                        | 156                                        | 156                                        | 156                                        | 156                                        | 156                                         | 156                                         |
| GOOF (S)                                 | 1.066                                      | 1.036                                      | 1.030                                      | 1.041                                      | 1.033                                      | 1.018                                       | 1.007                                       |
| $R_{\text{int}}$                         | 0.0434                                     | 0.0434                                     | 0.0466                                     | 0.0485                                     | 0.0529                                     | 0.0582                                      | 0.0627                                      |
| $R$ [ $I \geq 2\sigma(I)$ ]              | 0.0404                                     | 0.0422                                     | 0.0431                                     | 0.0434                                     | 0.0474                                     | 0.0496                                      | 0.0498                                      |
| $R$ [all data]                           | 0.0549                                     | 0.0638                                     | 0.0680                                     | 0.0780                                     | 0.0921                                     | 0.1079                                      | 0.1236                                      |
| CCDC<br>number                           | 1855860                                    | 1855848                                    | 1855849                                    | 1855850                                    | 1855851                                    | 1855852                                     | 1855853                                     |

| Compound              | 1_300K                                         | 1_310K                                         | 1_320K                                         | 1_330K                                         | 1_340K                                         | 1_350K                                         |
|-----------------------|------------------------------------------------|------------------------------------------------|------------------------------------------------|------------------------------------------------|------------------------------------------------|------------------------------------------------|
| Empirical formula     | C <sub>14</sub> H <sub>14</sub> O <sub>2</sub> |
| Crystal system        | orthorhombic                                   | orthorhombic                                   | orthorhombic                                   | orthorhombic                                   | orthorhombic                                   | orthorhombic                                   |
| Space group           | $P 2_1 2_1 2_1$                                |
| T (K)                 | 300(2)                                         | 310(2)                                         | 320(2)                                         | 330(2)                                         | 340(2)                                         | 350(2)                                         |
| $a$ /( $\text{\AA}$ ) | 5.7073(6)                                      | 5.7075(7)                                      | 5.7090(7)                                      | 5.7113(7)                                      | 5.7113(7)                                      | 5.7130(8)                                      |
| $b$ /( $\text{\AA}$ ) | 7.5909(7)                                      | 7.6016(7)                                      | 7.6146(8)                                      | 7.6271(8)                                      | 7.6398(9)                                      | 7.6527(9)                                      |
| $c$ /( $\text{\AA}$ ) | 28.133(3)                                      | 28.125(3)                                      | 28.123(4)                                      | 28.122(4)                                      | 28.117(4)                                      | 28.116(4)                                      |
| $\alpha$ /(deg)       | 90                                             | 90                                             | 90                                             | 90                                             | 90                                             | 90                                             |

|                                    |                                                                           |                                                                           |                                                                           |                                                                           |                                                                           |                                                                           |
|------------------------------------|---------------------------------------------------------------------------|---------------------------------------------------------------------------|---------------------------------------------------------------------------|---------------------------------------------------------------------------|---------------------------------------------------------------------------|---------------------------------------------------------------------------|
| $\beta$ /(deg)                     | 90                                                                        | 90                                                                        | 90                                                                        | 90                                                                        | 90                                                                        | 90                                                                        |
| $\gamma$ /(deg)                    | 90                                                                        | 90                                                                        | 90                                                                        | 90                                                                        | 90                                                                        | 90                                                                        |
| Volume/ $\text{\AA}^3$             | 1218.8(2)                                                                 | 1220.2(2)                                                                 | 1222.6(2)                                                                 | 1225.0(3)                                                                 | 1226.8(3)                                                                 | 1229.2(3)                                                                 |
| Z                                  | 4                                                                         | 4                                                                         | 4                                                                         | 4                                                                         | 4                                                                         | 4                                                                         |
| $D_{\text{cal}}/\text{g cm}^{-3}$  | 1.168                                                                     | 1.166                                                                     | 1.164                                                                     | 1.162                                                                     | 1.160                                                                     | 1.158                                                                     |
| $\mu/\text{mm}^{-1}$               | 0.077                                                                     | 0.077                                                                     | 0.077                                                                     | 0.077                                                                     | 0.077                                                                     | 0.076                                                                     |
| $F_{000}$                          | 456                                                                       | 456                                                                       | 456                                                                       | 456                                                                       | 456                                                                       | 456                                                                       |
| Crystal size/ $\text{mm}^3$        | 0.222 $\times$ 0.096<br>$\times$ 0.077                                    | 0.222 $\times$ 0.096 $\times$<br>0.077                                    |
| Radiation                          | 0.71073                                                                   | 0.71073                                                                   | 0.71073                                                                   | 0.71073                                                                   | 0.71073                                                                   | 0.71073                                                                   |
| $\theta$ range for data collection | 2.779-28.361                                                              | 2.776-28.291                                                              | 2.771-28.351                                                              | 2.767-28.367                                                              | 2.763-28.297                                                              | 2.758-28.350                                                              |
| Index ranges                       | -7 $\leq$ h $\leq$ 7; -9<br>$\leq$ k $\leq$ 10; -34<br>$\leq$ l $\leq$ 37 | -7 $\leq$ h $\leq$ 7; -10<br>$\leq$ k $\leq$ 9; -34 $\leq$ l<br>$\leq$ 37 | -7 $\leq$ h $\leq$ 7; -10<br>$\leq$ k $\leq$ 9; -34 $\leq$ l<br>$\leq$ 37 | -7 $\leq$ h $\leq$ 7; -10<br>$\leq$ k $\leq$ 9; -34 $\leq$ l<br>$\leq$ 37 | -7 $\leq$ h $\leq$ 7; -10<br>$\leq$ k $\leq$ 9; -34 $\leq$ l<br>$\leq$ 37 | -7 $\leq$ h $\leq$ 7; -10<br>$\leq$ k $\leq$ 9; -34 $\leq$ l<br>$\leq$ 37 |
| No. of measured reflections        | 13454                                                                     | 13440                                                                     | 13150                                                                     | 13167                                                                     | 13183                                                                     | 13248                                                                     |
| No. of independent reflections     | 3051                                                                      | 3040                                                                      | 3060                                                                      | 3066                                                                      | 3055                                                                      | 3073                                                                      |
| No. of observed reflections        | 1605                                                                      | 1532                                                                      | 1492                                                                      | 1446                                                                      | 1366                                                                      | 1324                                                                      |
| parameters                         | 156                                                                       | 156                                                                       | 156                                                                       | 156                                                                       | 156                                                                       | 156                                                                       |
| GOOF ( $S$ )                       | 0.999                                                                     | 0.997                                                                     | 0.997                                                                     | 0.997                                                                     | 0.980                                                                     | 0.983                                                                     |
| $R_{\text{int}}$                   | 0.0699                                                                    | 0.0711                                                                    | 0.0713                                                                    | 0.0730                                                                    | 0.0769                                                                    | 0.0774                                                                    |
| $R$ [ $I > 2\sigma(I)$ ]           | 0.0529                                                                    | 0.0548                                                                    | 0.0529                                                                    | 0.0541                                                                    | 0.0534                                                                    | 0.0530                                                                    |
| $R$ [all data]                     | 0.1434                                                                    | 0.1480                                                                    | 0.1593                                                                    | 0.1677                                                                    | 0.1785                                                                    | 0.1840                                                                    |
| CCDC number                        | 1855854                                                                   | 1855855                                                                   | 1855856                                                                   | 1855857                                                                   | 1855858                                                                   | 1855859                                                                   |

**Table S2.** Crystallographic data and refinement parameters for **2**

| Compound              | <b>2_100K</b>                                  | <b>2_150K</b>                                  | <b>2_200K</b>                                  | <b>2_250K</b>                                  | <b>2_300K</b>                                  | <b>2_350K</b>                                  | <b>2_400K</b>                                  |
|-----------------------|------------------------------------------------|------------------------------------------------|------------------------------------------------|------------------------------------------------|------------------------------------------------|------------------------------------------------|------------------------------------------------|
| Empirical formula     | C <sub>18</sub> H <sub>16</sub> O <sub>2</sub> |
| Crystal system        | orthorhombic                                   |
| Space group           | $P 2_1 2_1 2_1$                                |
| Temperature           | 100(2)                                         | 150(2)                                         | 200(2)                                         | 250(2)                                         | 300(2)                                         | 350(2)                                         | 400(2)                                         |
| $a$ /( $\text{\AA}$ ) | 5.8843(4)                                      | 5.8912(4)                                      | 5.8987(3)                                      | 5.9061(3)                                      | 5.9146(3)                                      | 5.9244(3)                                      | 5.9264(11)                                     |
| $b$ /( $\text{\AA}$ ) | 7.2086(5)                                      | 7.2496(5)                                      | 7.2946(5)                                      | 7.3412(5)                                      | 7.3912(5)                                      | 7.4427(5)                                      | 7.4922(18)                                     |
| $c$ /( $\text{\AA}$ ) | 32.936(2)                                      | 32.950(2)                                      | 32.966(2)                                      | 32.9746(19)                                    | 32.9799(19)                                    | 32.968(2)                                      | 32.946(7)                                      |
| $\alpha$ /(deg)       | 90                                             | 90                                             | 90                                             | 90                                             | 90                                             | 90                                             | 90                                             |
| $\beta$ /(deg)        | 90                                             | 90                                             | 90                                             | 90                                             | 90                                             | 90                                             | 90                                             |

|                                    |                                                          |                                                          |                                                          |                                                          |                                                          |                                                          |                                                           |
|------------------------------------|----------------------------------------------------------|----------------------------------------------------------|----------------------------------------------------------|----------------------------------------------------------|----------------------------------------------------------|----------------------------------------------------------|-----------------------------------------------------------|
| $\gamma/(\text{deg})$              | 90                                                       | 90                                                       | 90                                                       | 90                                                       | 90                                                       | 90                                                       | 90                                                        |
| Volume/ $\text{\AA}^3$             | 1397.04(17)                                              | 1407.27(17)                                              | 1418.46(15)                                              | 1429.71(15)                                              | 1441.75(15)                                              | 1453.69(15)                                              | 1462.9(5)                                                 |
| Z                                  | 4                                                        | 4                                                        | 4                                                        | 4                                                        | 4                                                        | 4                                                        | 4                                                         |
| $D_{\text{cal}}/\text{g cm}^{-3}$  | 1.257                                                    | 1.247                                                    | 1.238                                                    | 1.228                                                    | 1.218                                                    | 1.208                                                    | 1.200                                                     |
| $\mu/\text{mm}^{-1}$               | 0.081                                                    | 0.080                                                    | 0.080                                                    | 0.080                                                    | 0.079                                                    | 0.079                                                    | 0.077                                                     |
| $F_{000}$                          | 560                                                      | 560                                                      | 560                                                      | 560                                                      | 560                                                      | 560                                                      | 560                                                       |
| Crystal size/ $\text{mm}^3$        | $0.363 \times 0.324 \times 0.085$                         |
| Radiation                          | 0.71073                                                  | 0.71073                                                  | 0.71073                                                  | 0.71073                                                  | 0.71073                                                  | 0.71073                                                  | 0.71073                                                   |
| $\theta$ range for data collection | 2.474-28.249                                             | 2.472-28.294                                             | 2.471-28.321                                             | 2.471-28.313                                             | 2.470-28.308                                             | 2.471-28.349                                             | 2.473-28.371                                              |
| Index ranges                       | $-5 \leq h \leq 7; -6 \leq k \leq 9; -43 \leq l \leq 43$ | $-6 \leq h \leq 7; -6 \leq k \leq 9; -43 \leq l \leq 43$ | $-6 \leq h \leq 7; -6 \leq k \leq 9; -43 \leq l \leq 44$ | $-7 \leq h \leq 6; -9 \leq k \leq 6; -43 \leq l \leq 44$ | $-7 \leq h \leq 6; -9 \leq k \leq 6; -43 \leq l \leq 44$ | $-7 \leq h \leq 6; -9 \leq k \leq 6; -43 \leq l \leq 44$ | $-7 \leq h \leq 6; -10 \leq k \leq 6; -43 \leq l \leq 44$ |
| No. of measured reflections        | 8232                                                     | 8332                                                     | 8484                                                     | 8656                                                     | 8646                                                     | 8778                                                     | 8806                                                      |
| No. of independent reflections     | 2777                                                     | 2677                                                     | 2578                                                     | 2411                                                     | 2384                                                     | 2196                                                     | 1960                                                      |
| No. of observed reflections        | 3311                                                     | 3364                                                     | 3423                                                     | 3492                                                     | 3491                                                     | 3552                                                     | 3599                                                      |
| parameters                         | 192                                                      | 192                                                      | 192                                                      | 192                                                      | 192                                                      | 192                                                      | 192                                                       |
| GOOF (S)                           | 1.052                                                    | 1.063                                                    | 1.071                                                    | 0.996                                                    | 1.026                                                    | 1.033                                                    | 1.031                                                     |
| $R_{\text{int}}$                   | 0.0277                                                   | 0.0301                                                   | 0.0300                                                   | 0.0327                                                   | 0.0271                                                   | 0.0293                                                   | 0.0310                                                    |
| $R [I \geq 2\sigma(I)]$            | 0.0396                                                   | 0.0417                                                   | 0.0429                                                   | 0.0433                                                   | 0.0418                                                   | 0.0447                                                   | 0.0437                                                    |
| $R$ [all data]                     | 0.0544                                                   | 0.0632                                                   | 0.0720                                                   | 0.0810                                                   | 0.0792                                                   | 0.0956                                                   | 0.1132                                                    |
| CCDC number                        | 1855861                                                  | 1855862                                                  | 1855863                                                  | 1855864                                                  | 1855865                                                  | 1855866                                                  | 1855867                                                   |

**Table S3.** Change of Unit cell parameters in **1** with change of temperature.

| T(K) | $a$ ( $\text{\AA}$ ) | $b$ ( $\text{\AA}$ ) | $c$ ( $\text{\AA}$ ) | Vol. ( $\text{\AA}^3$ ) |
|------|----------------------|----------------------|----------------------|-------------------------|
| 90   | 5.6838(4)            | 7.3834(4)            | 28.139(2)            | 1180.88(14)             |
| 120  | 5.6861(4)            | 7.4078(5)            | 28.140(2)            | 1185.29(15)             |
| 150  | 5.6883(4)            | 7.4344(5)            | 28.143(3)            | 1190.07(17)             |
| 180  | 5.6915(5)            | 7.4628(5)            | 28.143(3)            | 1195.37(17)             |
| 210  | 5.6944(5)            | 7.4936(6)            | 28.143(3)            | 1200.89(18)             |
| 240  | 5.6982(5)            | 7.5247(6)            | 28.143(3)            | 1206.69(19)             |

|     |           |           |           |             |
|-----|-----------|-----------|-----------|-------------|
| 270 | 5.7057(5) | 7.5595(6) | 28.152(3) | 1214.24(18) |
| 300 | 5.7073(6) | 7.5909(7) | 28.133(3) | 1218.8(2)   |
| 310 | 5.7075(7) | 7.6016(7) | 28.125(3) | 1220.2(2)   |
| 320 | 5.7090(7) | 7.6146(8) | 28.123(4) | 1226.6(2)   |
| 330 | 5.7113(7) | 7.6271(8) | 28.122(4) | 1225.0(3)   |
| 340 | 5.7113(7) | 7.6398(9) | 28.117(4) | 1226.8(3)   |
| 350 | 5.7130(8) | 7.6527(9) | 28.116(4) | 1229.2(3)   |

Note: PTE of  $c$  axis from 90 K to 270 K highlighted by light orange color and NTE of  $c$  axis from 300 K to 350K highlighted by light blue color.

**Table S4.** Change of Unit cell parameters in **2** with temperature.

| <b>T(K)</b> | <b><math>a</math> (Å)</b> | <b><math>b</math> (Å)</b> | <b><math>c</math> (Å)</b> | <b>Vol.(Å<sup>3</sup>)</b> |
|-------------|---------------------------|---------------------------|---------------------------|----------------------------|
| 100         | 5.8843(4)                 | 7.2086(5)                 | 32.936(2)                 | 1397.04(17)                |
| 150         | 5.8912(4)                 | 7.2496(5)                 | 32.950(2)                 | 1407.27(17)                |
| 200         | 5.8987(3)                 | 7.2946(5)                 | 32.966(2)                 | 1418.46(15)                |
| 250         | 5.9061(3)                 | 7.3412(5)                 | 32.975(2)                 | 1429.71(15)                |
| 300         | 5.9146(3)                 | 7.3912(5)                 | 32.980(2)                 | 1441.75(15)                |
| 350         | 5.9244(3)                 | 7.4427(5)                 | 32.968(2)                 | 1453.69(15)                |
| 400         | 5.9264(11)                | 7.4922(18)                | 32.946(7)                 | 1462.9(5)                  |

Note: PTE of  $c$  axis from 100 K to 300 K highlighted by light orange color and NTE of  $c$  axis from 300 K to 400K highlighted by light blue color.

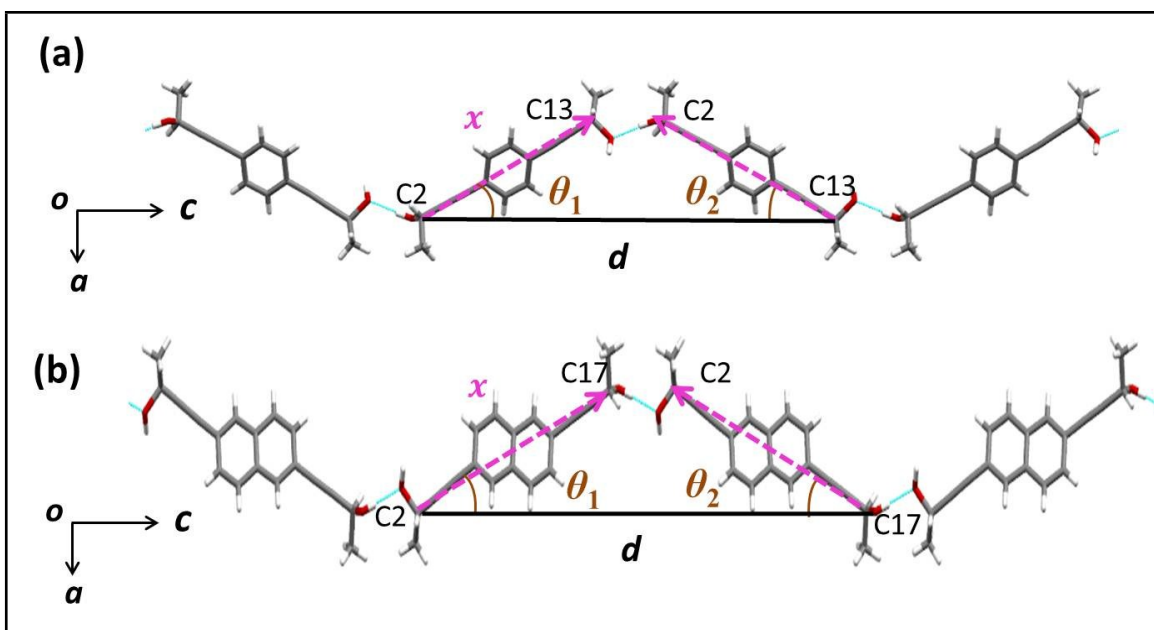

**Figure S9.** Representation of molecular length ( $x$ ) between C2-C13 in **1** and C2-C17 in **2** and tilt angle  $\theta_1$  and  $\theta_2$  in **1** and **2**.

**Table S5.** Change of Distance between C2-C13 (distance  $x$ , between chiral C atoms positioned at the terminal as shown in Figure S9(a)) in **1** with temperature.

| Temperature | Distance (C2-C13) / Å |
|-------------|-----------------------|
| 90K         | 10.997(3)             |
| 120K        | 10.995(3)             |
| 150K        | 10.989(3)             |
| 180K        | 10.985(3)             |
| 210K        | 10.981(3)             |
| 240K        | 10.973(3)             |
| 270K        | 10.964(4)             |
| 300K        | 10.955(4)             |
| 310K        | 10.953(4)             |
| 320K        | 10.947(4)             |
| 330K        | 10.940(4)             |
| 340K        | 10.942(5)             |

|      |           |
|------|-----------|
| 350K | 10.937(4) |
|------|-----------|

**Table S6.** Distance between C2-C17 (distance  $x$ , between the chiral C atoms positioned at the terminal as shown in Figure S9(b)) of **2** at different temperature.

| Temperature | Distance (C2-C17) / Å |
|-------------|-----------------------|
| 100K        | 13.169(3)             |
| 150K        | 13.165(3)             |
| 200K        | 13.156(3)             |
| 250K        | 13.149(3)             |
| 300K        | 13.136(3)             |
| 350K        | 13.119(3)             |
| 400K        | 13.095(5)             |

**Table S7.** Change of Tilt angle ( $\theta_1$  and  $\theta_2$ ) with temperature for compound **1** (Figure S9(a))

| Temperature | Angle ( $\theta_1$ ) $\angle$ C13-C2-C13(°) | Angle ( $\theta_2$ ) $\angle$ C2-C13-C2(°) |
|-------------|---------------------------------------------|--------------------------------------------|
| 90K         | 26.88(1)                                    | 25.36(1)                                   |
| 120K        | 26.82(1)                                    | 25.29(1)                                   |
| 150K        | 26.75(1)                                    | 25.22(1)                                   |
| 180K        | 26.69(1)                                    | 25.14(1)                                   |
| 210K        | 26.62(1)                                    | 25.07(1)                                   |
| 240K        | 26.58(2)                                    | 25.01(2)                                   |
| 270K        | 26.53(2)                                    | 24.94(2)                                   |
| 300K        | 26.48(2)                                    | 24.89(2)                                   |
| 310K        | 26.46(2)                                    | 24.83(2)                                   |
| 320K        | 26.43(2)                                    | 24.79(2)                                   |
| 330K        | 26.42(2)                                    | 24.79(2)                                   |

|      |          |          |
|------|----------|----------|
| 340K | 26.41(2) | 24.76(2) |
| 350K | 26.37(2) | 24.73(2) |

**Table S8.** Change of Tilt angle ( $\theta_1$  and  $\theta_2$ ) with temperature for compound **2** (Figure S9(b)).

| Temperature | Angle ( $\theta_1$ ) $\angle$ C17-C2-C17(°) | Angle ( $\theta_2$ ) $\angle$ C2-C17-C2(°) |
|-------------|---------------------------------------------|--------------------------------------------|
| 100K        | 21.76(1)                                    | 20.49(1)                                   |
| 150K        | 21.63(1)                                    | 20.33(1)                                   |
| 200K        | 21.53(1)                                    | 20.18(1)                                   |
| 250K        | 21.40(1)                                    | 20.02(1)                                   |
| 300K        | 21.27(1)                                    | 19.87(1)                                   |
| 350K        | 21.18(2)                                    | 19.73(1)                                   |
| 400K        | 21.07(2)                                    | 19.58(2)                                   |

**Table S9.** Change of Hydrogen bonding parameters in compound **1** with Temperature.<sup>4</sup>

| T (K)       | Donor – H $\cdots$ Acceptor | D – H (Å) | H $\cdots$ A (Å) | D $\cdots$ A (Å) | $\angle$ D – H $\cdots$ A (°) |
|-------------|-----------------------------|-----------|------------------|------------------|-------------------------------|
| <b>90K</b>  | O(1) – H(1) $\cdots$ O(2)   | 0.85(3)   | 1.83(3)          | 2.6752(18)       | 175(3)                        |
|             | O(2) – H(2A) $\cdots$ O(1)  | 0.89(3)   | 1.84(3)          | 2.7215(18)       | 172(2)                        |
| <b>120K</b> | O(1) – H(1) $\cdots$ O(2)   | 0.82(3)   | 1.86(3)          | 2.677(2)         | 174(3)                        |
|             | O(2) – H(2A) $\cdots$ O(1)  | 0.90(3)   | 1.83(3)          | 2.724(2)         | 169(3)                        |
| <b>150K</b> | O(1) – H(1) $\cdots$ O(2)   | 0.84(3)   | 1.84(3)          | 2.680(2)         | 175(3)                        |
|             | O(2) – H(2A) $\cdots$ O(1)  | 0.94(3)   | 1.80(3)          | 2.728(2)         | 169(2)                        |
| <b>180K</b> | O(1) – H(1) $\cdots$ O(2)   | 0.85(3)   | 1.83(3)          | 2.683(2)         | 176(3)                        |
|             | O(2) – H(2A) $\cdots$ O(1)  | 0.93(3)   | 1.81(3)          | 2.732(2)         | 169(3)                        |
| <b>210K</b> | O(1) – H(1) $\cdots$ O(2)   | 0.81(3)   | 1.88(3)          | 2.686(2)         | 178(3)                        |



|             |                    |         |         |          |        |
|-------------|--------------------|---------|---------|----------|--------|
|             | O(2) – H(2A) ⋯O(1) | 0.91(3) | 1.83(3) | 2.735(2) | 169(3) |
| <b>240K</b> | O(1) – H(1) ⋯O(2)  | 0.85(3) | 1.84(3) | 2.689(3) | 177(4) |
|             | O(2) – H(2A) ⋯O(1) | 0.91(3) | 1.84(3) | 2.743(2) | 169(3) |
| <b>270K</b> | O(1) – H(1) ⋯O(2)  | 0.84(3) | 1.85(3) | 2.695(3) | 179(5) |
|             | O(2) – H(2A) ⋯O(1) | 0.91(3) | 1.86(3) | 2.748(3) | 165(3) |
| <b>300K</b> | O(1) – H(1) ⋯O(2)  | 0.86(3) | 1.84(3) | 2.696(3) | 179(4) |
|             | O(2) – H(2A) ⋯O(1) | 0.91(3) | 1.87(3) | 2.752(3) | 163(3) |
| <b>310K</b> | O(1) – H(1) ⋯O(2)  | 0.86(4) | 1.84(4) | 2.694(3) | 179(5) |
|             | O(2) – H(2A) ⋯O(1) | 0.91(4) | 1.87(4) | 2.753(3) | 164(3) |
| <b>320K</b> | O(1) – H(1) ⋯O(2)  | 0.79(4) | 1.91(4) | 2.699(3) | 174(4) |
|             | O(2) – H(2A) ⋯O(1) | 0.90(4) | 1.88(4) | 2.755(3) | 165(3) |
| <b>330K</b> | O(1) – H(1) ⋯O(2)  | 0.84(4) | 1.86(4) | 2.699(3) | 175(4) |
|             | O(2) – H(2A) ⋯O(1) | 0.92(4) | 1.86(4) | 2.761(3) | 166(3) |
| <b>340K</b> | O(1) – H(1) ⋯O(2)  | 0.82(4) | 1.89(4) | 2.700(3) | 177(6) |
|             | O(2) – H(2A) ⋯O(1) | 0.88(4) | 1.91(4) | 2.761(4) | 162(4) |
| <b>350K</b> | O(1) – H(1) ⋯O(2)  | 0.83(4) | 1.87(4) | 2.700(3) | 178(4) |
|             | O(2) – H(2A) ⋯O(1) | 0.88(4) | 1.91(4) | 2.765(3) | 164(3) |

Symmetry Code for O(1) – H(1) ⋯O(2) :  $1/2-x, 1-y, -1/2+z$ ;

Symmetry Code for O(2) – H(2A) ⋯O(1):  $1-x, -1/2+y, 1/2-z$ .

**Table S10.** Change of Hydrogen bonding parameters in compound **2** with Temperature.<sup>4</sup>

| <b>T(K)</b> | <b>Donor – H⋯Acceptor</b> | <b>D – H (Å)</b> | <b>H⋯A (Å)</b> | <b>D⋯A (Å)</b> | <b>∠D – H⋯A (°)</b> |
|-------------|---------------------------|------------------|----------------|----------------|---------------------|
| <b>100K</b> | O(1) – H(1A) ⋯O(2)*       | 0.80(3)          | 1.87(3)        | 2.6729(19)     | 179(5)              |
|             | O(2) – H(2A) ⋯O(1)        | 0.92(3)          | 1.80(3)        | 2.7158(18)     | 175(3)              |
| <b>150K</b> | O(1) – H(1A) ⋯O(2)        | 0.87(4)          | 1.81(4)        | 2.672(2)       | 175(3)              |
|             | O(2) – H(2A) ⋯O(1)        | 0.85(3)          | 1.88(3)        | 2.728(3)       | 174(3)              |
| <b>200K</b> | O(1) – H(1A) ⋯O(2)        | 0.85(3)          | 1.83(3)        | 2.678(2)       | 175(3)              |
|             | O(2) – H(2A) ⋯O(1)        | 0.89(4)          | 1.85(4)        | 2.733(3)       | 174(3)              |
|             | O(1) – H(1A) ⋯O(2)        | 0.80(4)          | 1.89(4)        | 2.685(2)       | 173(3)              |

|             |                    |         |         |          |        |
|-------------|--------------------|---------|---------|----------|--------|
| <b>250K</b> | O(2) – H(2A) ⋯O(1) | 0.89(4) | 1.85(4) | 2.736(3) | 175(4) |
| <b>300K</b> | O(1) – H(1A) ⋯O(2) | 0.85(4) | 1.84(4) | 2.691(2) | 174(4) |
|             | O(2) – H(2A) ⋯O(1) | 0.88(4) | 1.87(4) | 2.747(3) | 174(3) |
| <b>350K</b> | O(1) – H(1A) ⋯O(2) | 0.89(4) | 1.82(4) | 2.700(2) | 170(3) |
|             | O(2) – H(2A) ⋯O(1) | 0.96(4) | 1.80(4) | 2.753(3) | 175(4) |
| <b>400K</b> | O(1) – H(1A) ⋯O(2) | 0.90(4) | 1.81(4) | 2.705(3) | 174(4) |
|             | O(2) – H(2A) ⋯O(1) | 0.96(5) | 1.81(5) | 2.761(4) | 173(4) |

Symmetry Code for O(1) – H(1A) ⋯O(2):  $3/2-x, 1-y, 1/2+z$

Symmetry Code for O(2) – H(2A) ⋯O(1):  $1-x, -1/2+y, 3/2-z$ .

#### 4. Powder X-ray Diffraction.

The Powder X-Ray diffraction studies of both the compounds were carried on a PANalytical X'pert PRO X-ray Powder Diffractometer using CuK $\alpha$ 1 radiation(1.54Å). The crystals of the synthesized compounds were crushed gently and layered on a glass slide. Data were collected at room temperature at scan rate of 2°/ min from 5° to 40°(2 $\theta$  value).

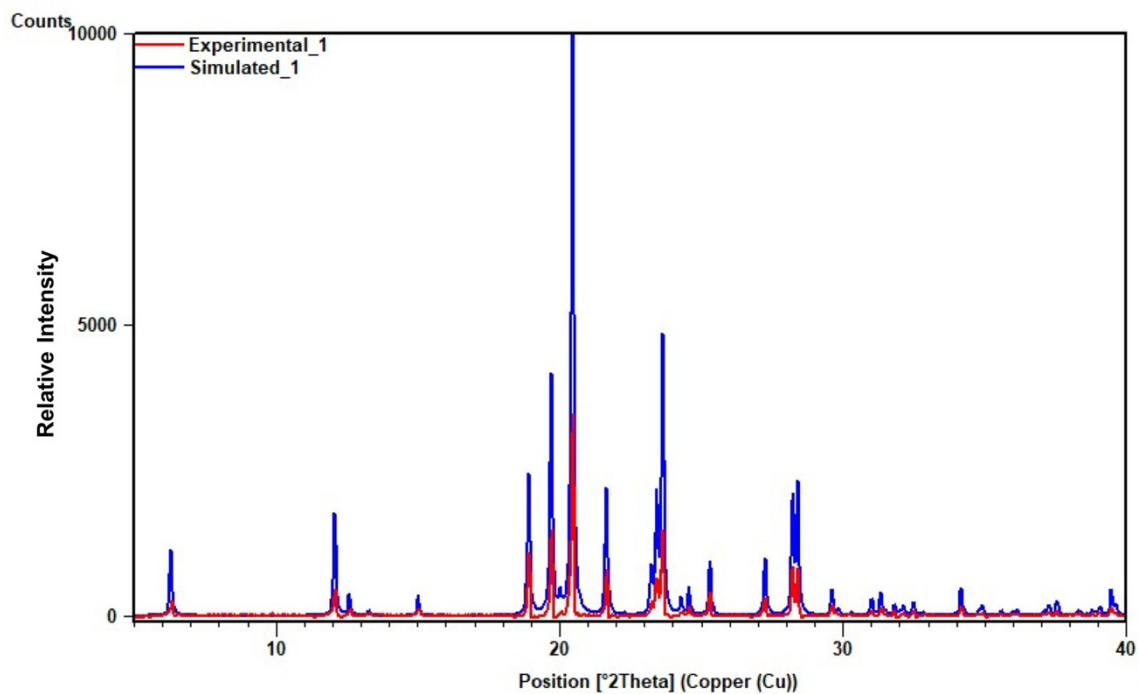

**Figure S10.** Powder X-ray Diffraction of bulk sample of compound **1** (red) and simulated pattern obtained from SCXRD data (blue).

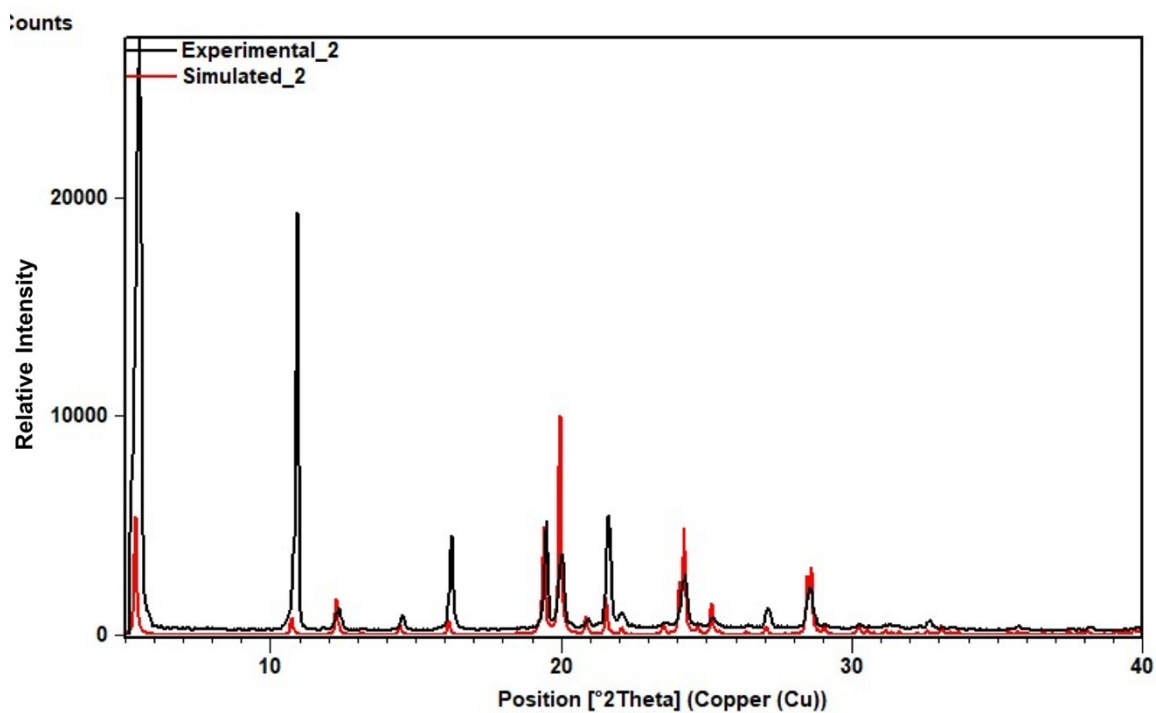

**Figure S11.** Powder X-ray Diffractogram of bulk sample of compound **2** (black) and simulated pattern obtained from SCXRD data (red).

**5. Variation of Atomic Displacement Parameters ( $U_{11}$ ,  $U_{22}$  and  $U_{33}$ ) of Carbon atoms with Temperature for compound **1** and **2**.**

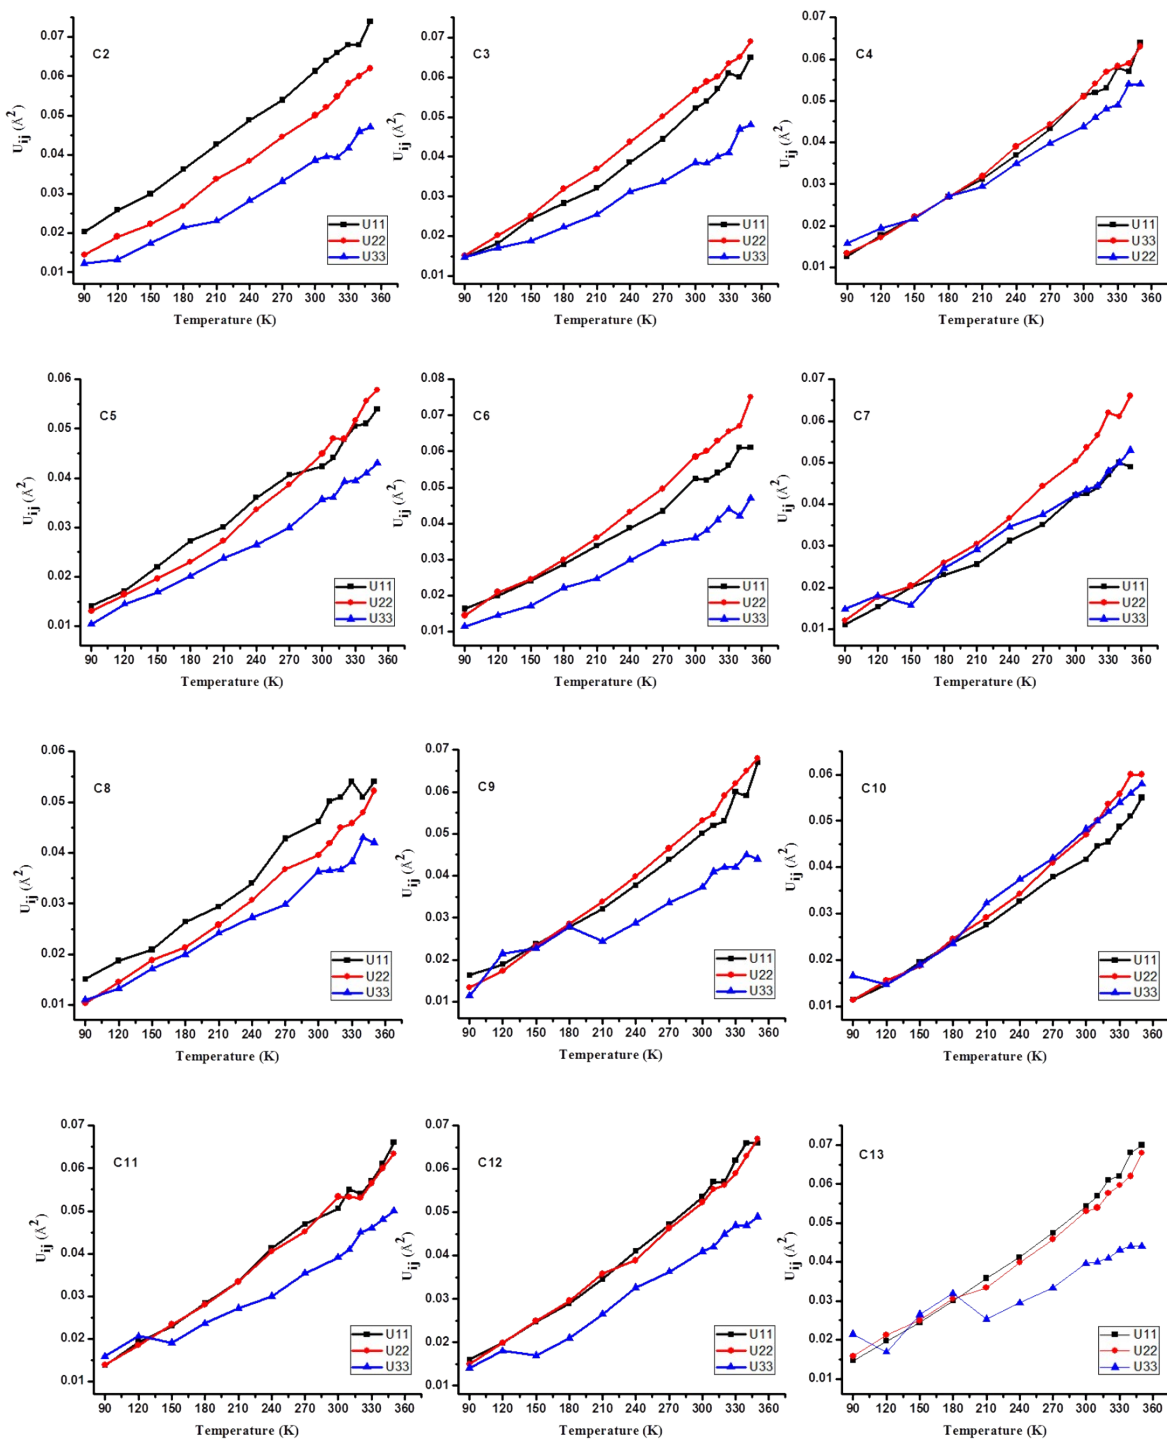

**Figure S12.** Change of ADPs ( $U_{11}$ ,  $U_{22}$  and  $U_{33}$ ) of carbon atoms of compound 1 with temperature.

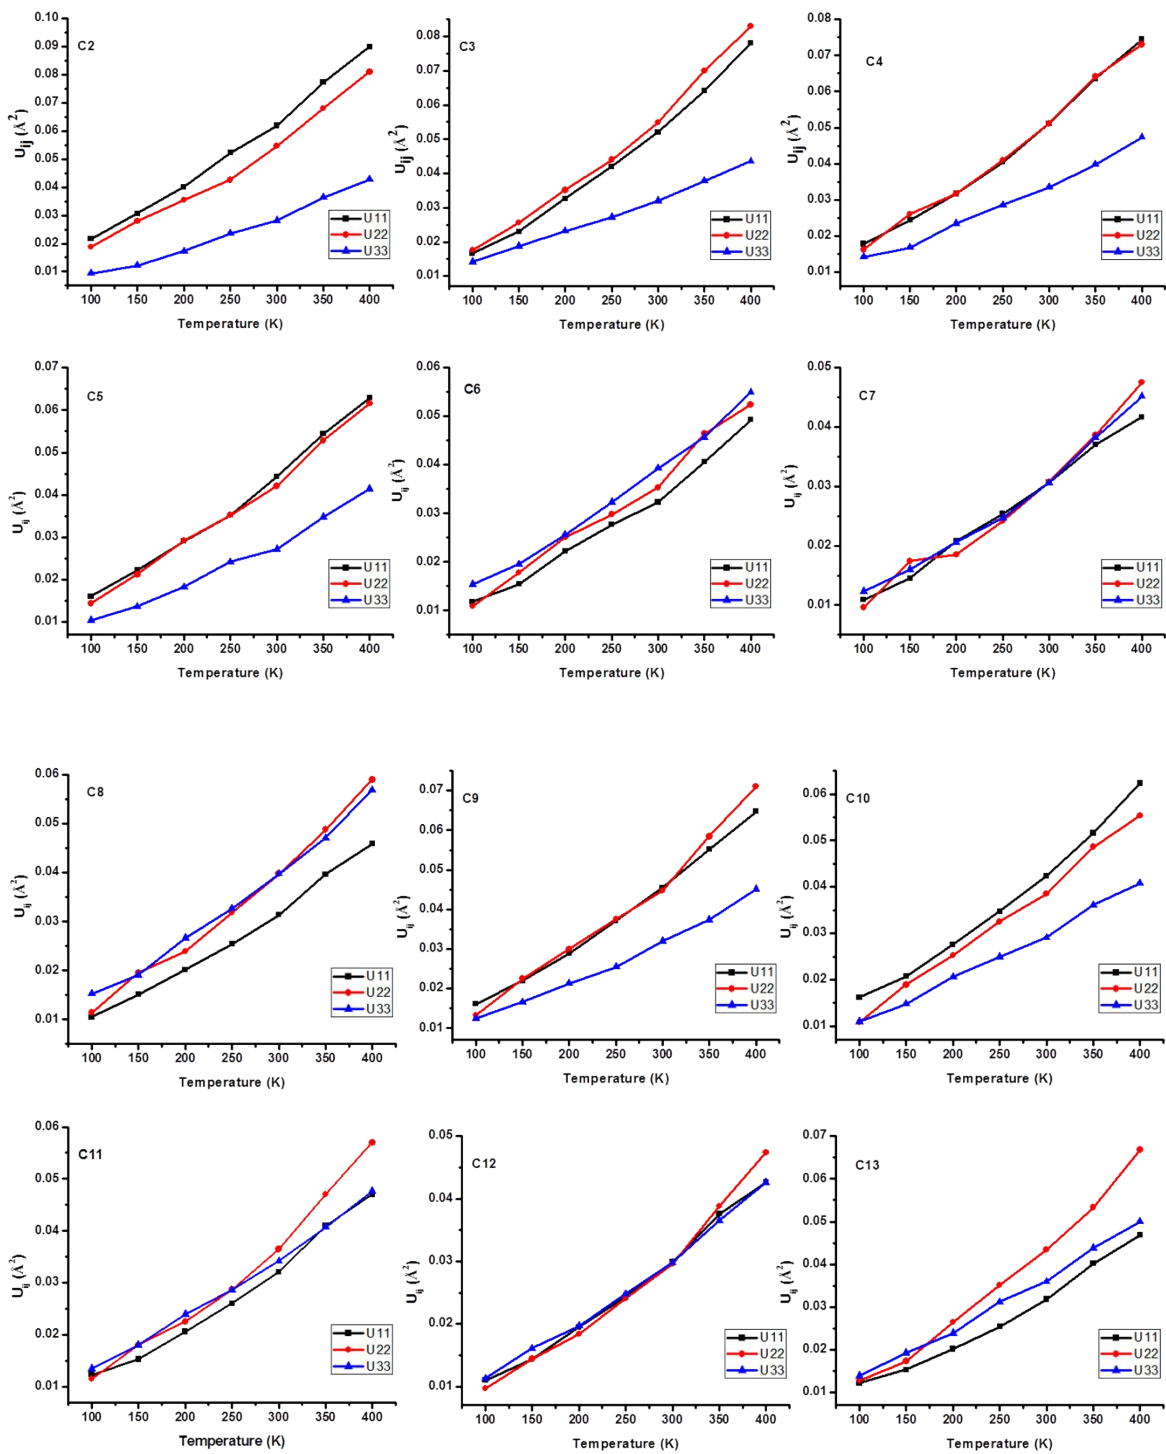

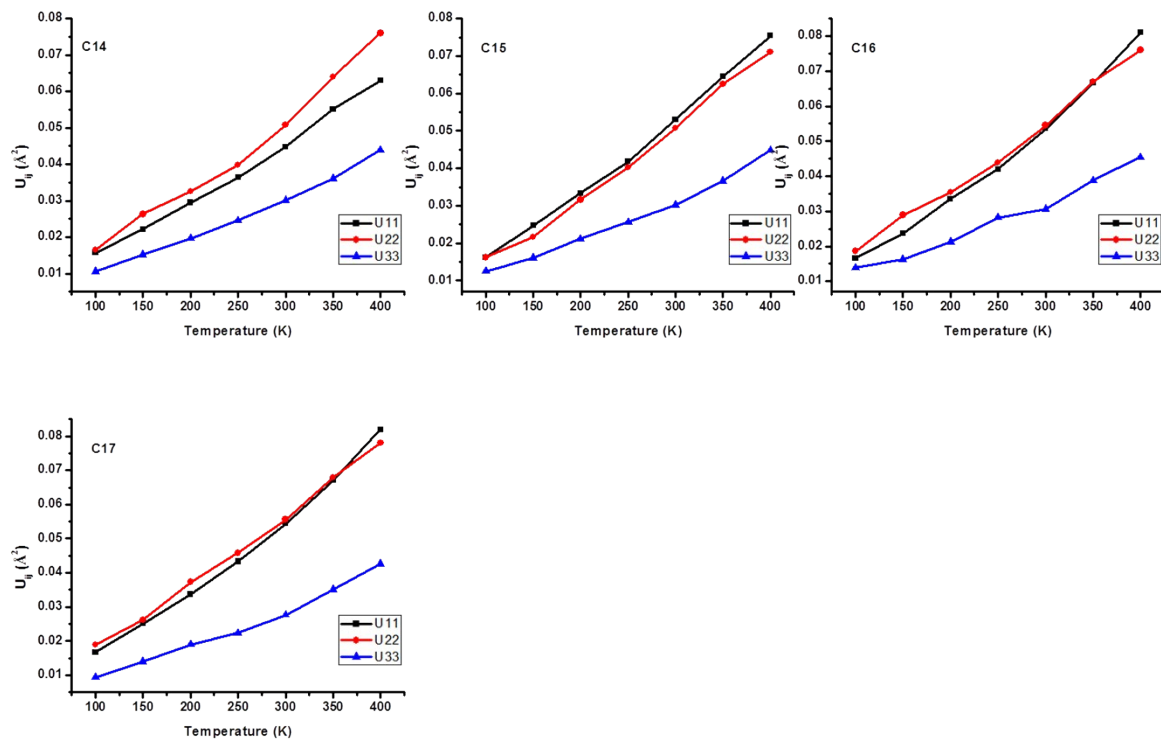

**Figure S13.** Change of ADPs ( $U_{11}$ ,  $U_{22}$  and  $U_{33}$ ) of carbon atoms of compound **2** with temperature.

## 6. Thermal Ellipsoid Plot for compound **1** and **2** at variable temperatures.

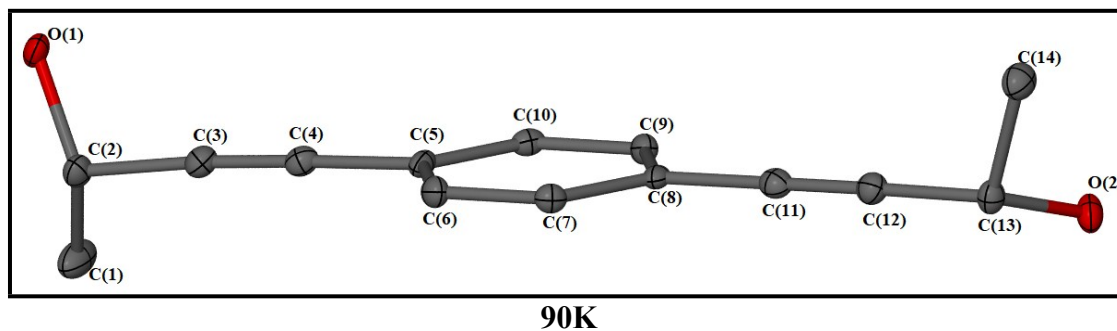

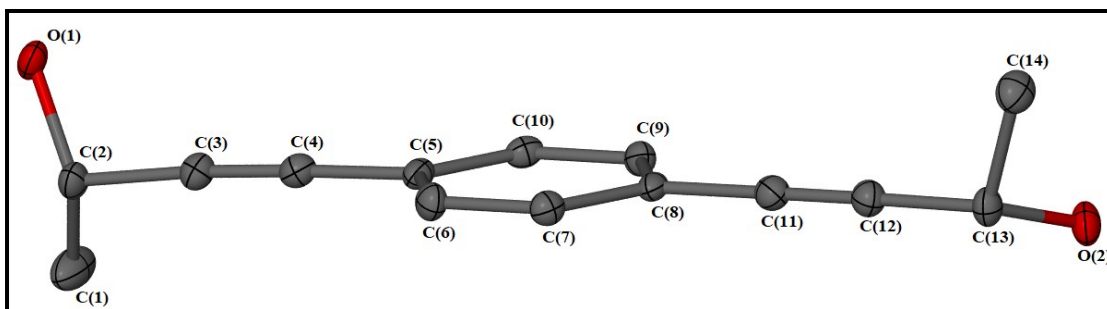

120K

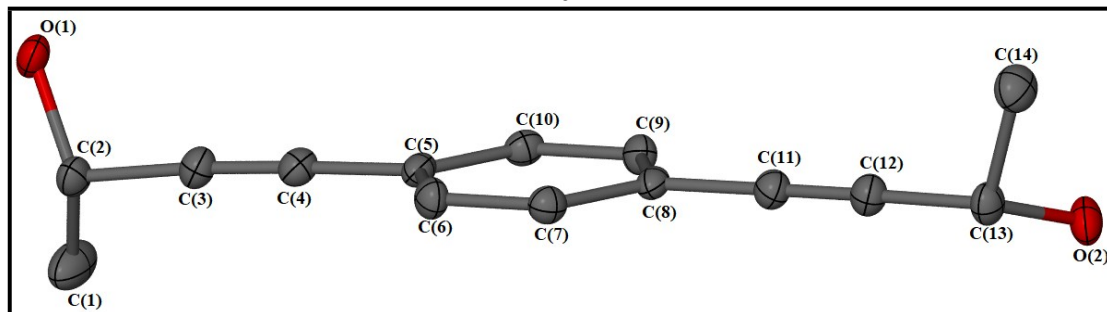

150K

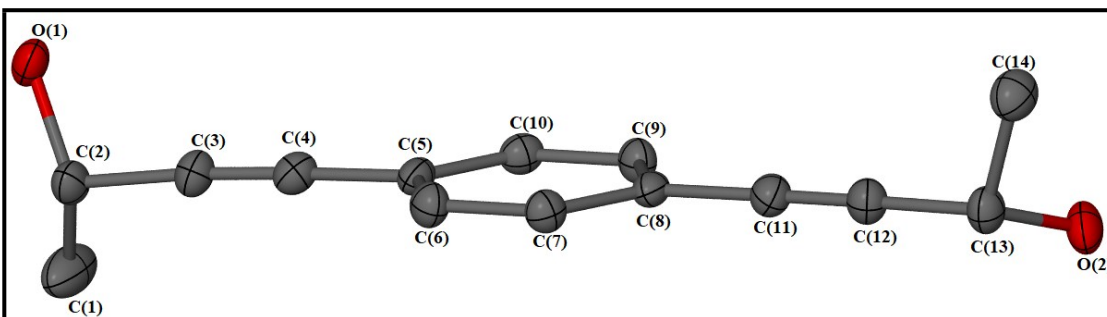

180 K

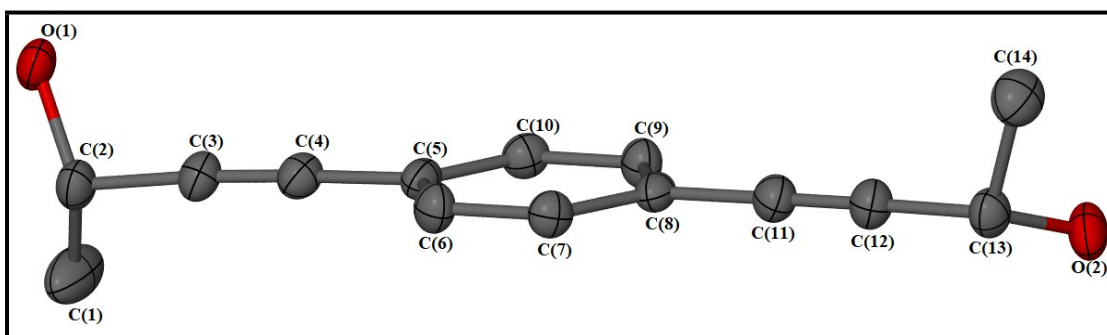

210 K

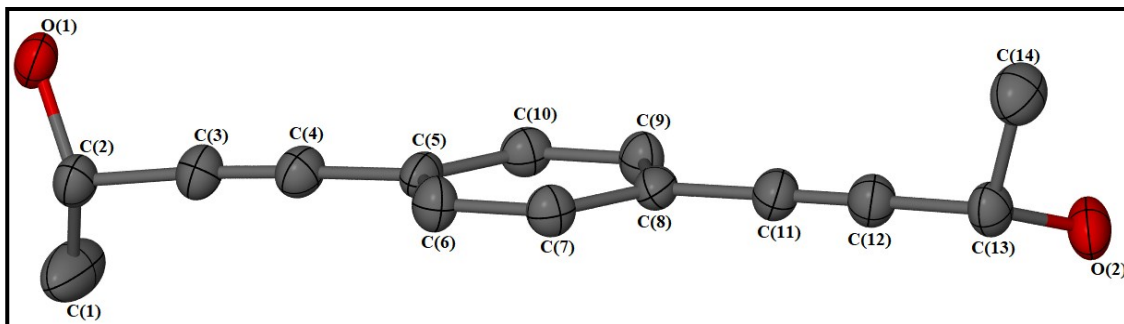

240 K

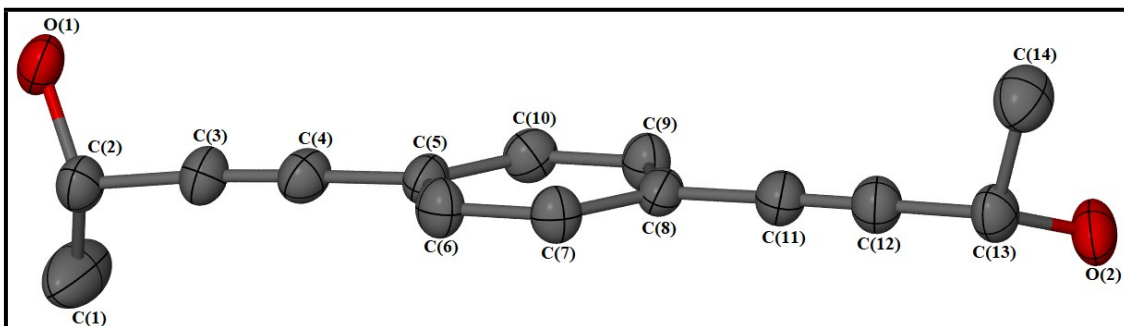

270 K

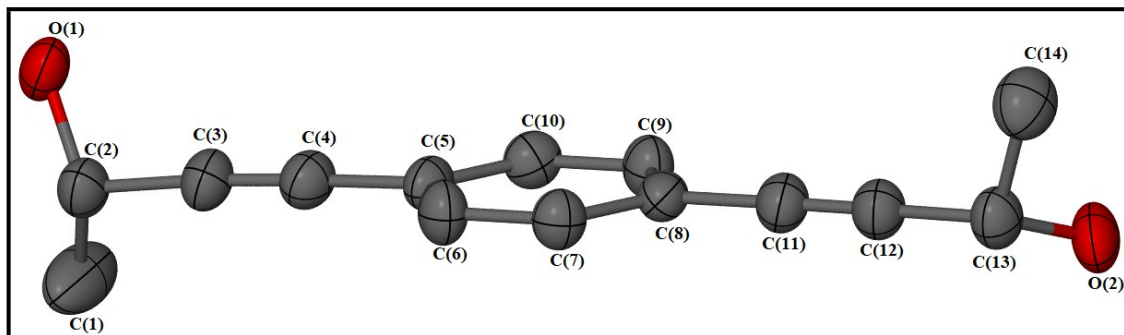

300 K

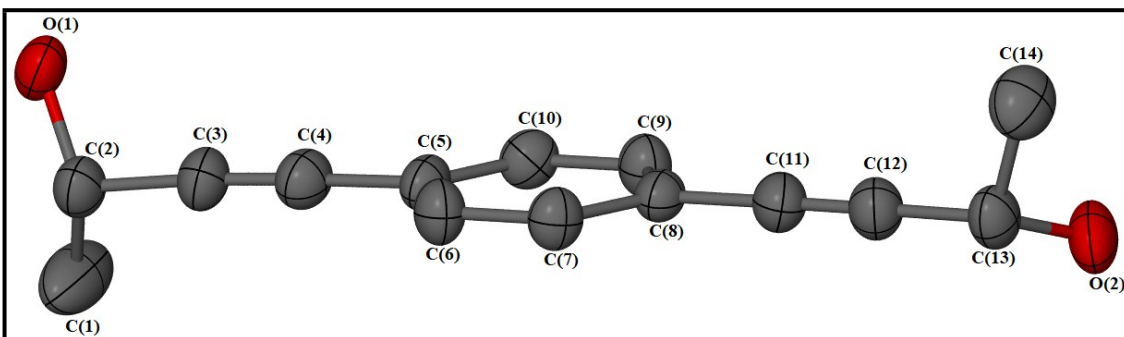

310 K



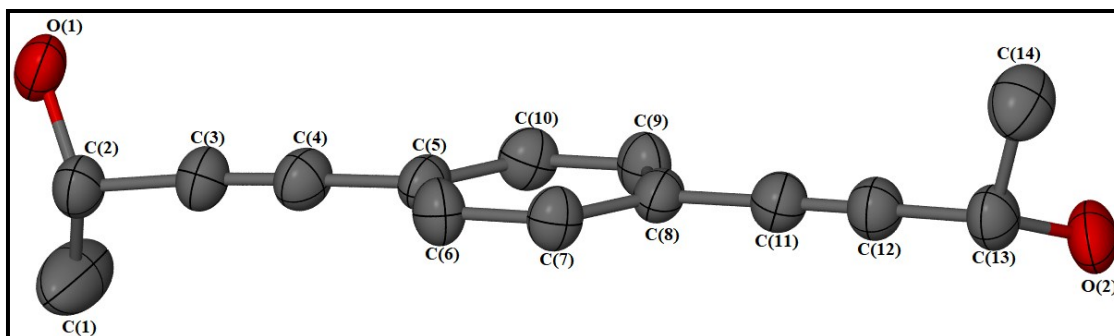

320 K

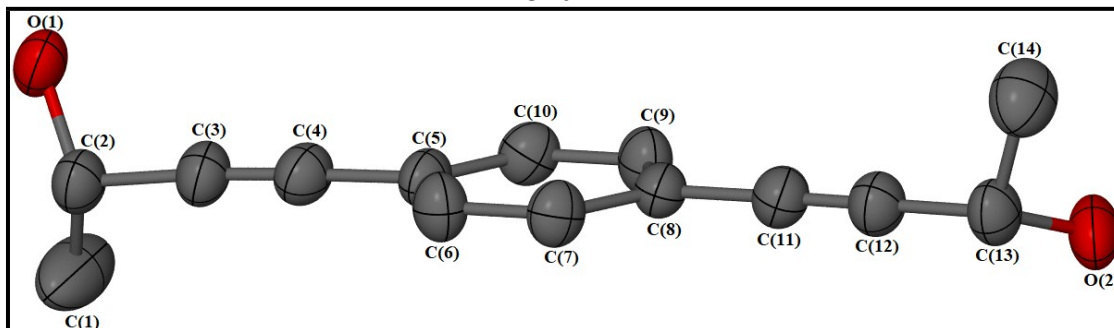

330 K

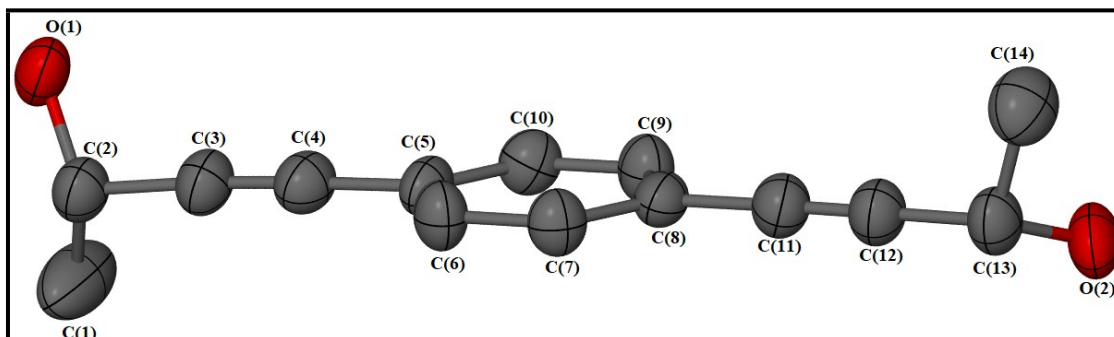

340 K

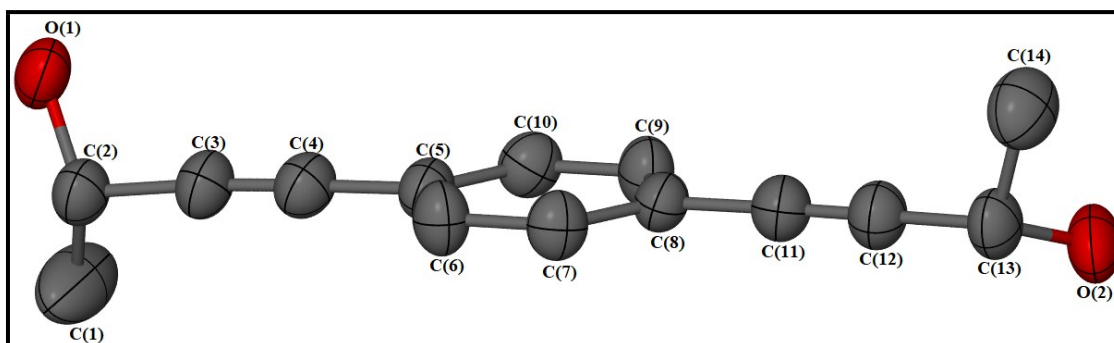

350 K

**Figure S14.** Thermal ellipsoid plot of the molecule in the asymmetric unit of the crystal structure of compound **1** at different temperature. Thermal ellipsoid plots are shown in 50 % probability.

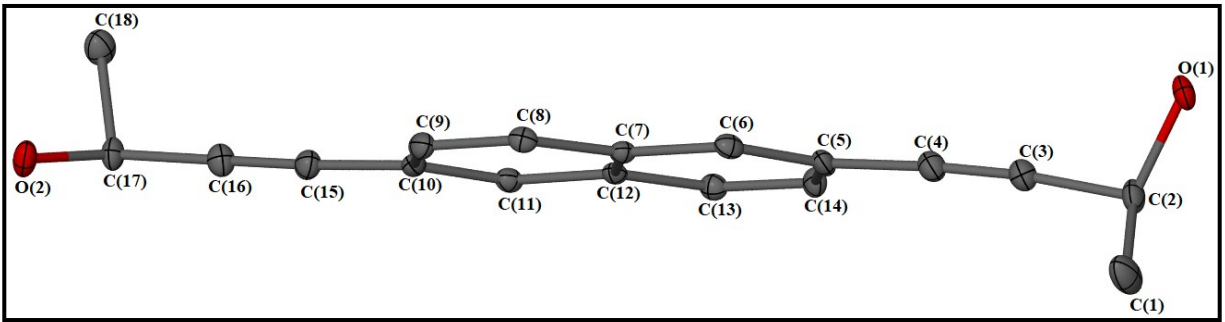

100K

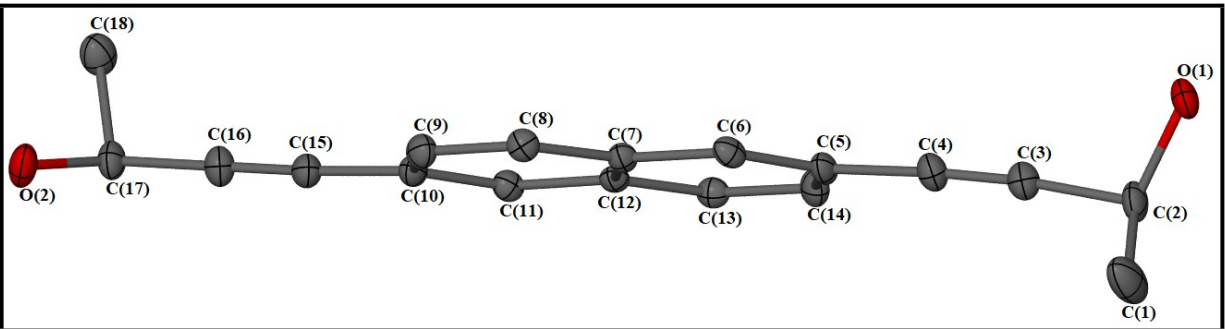

150 K

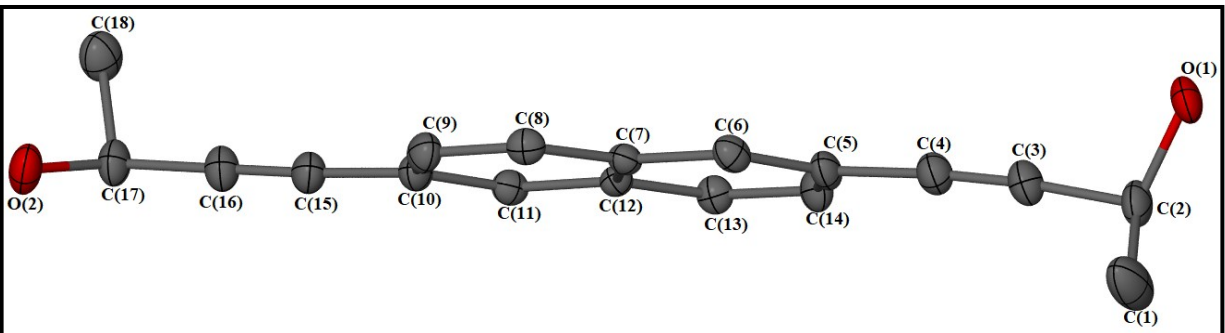

200 K

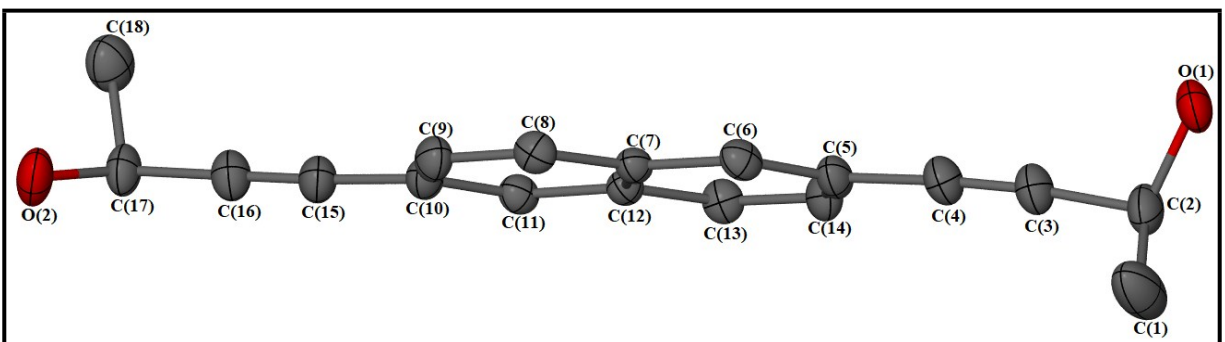

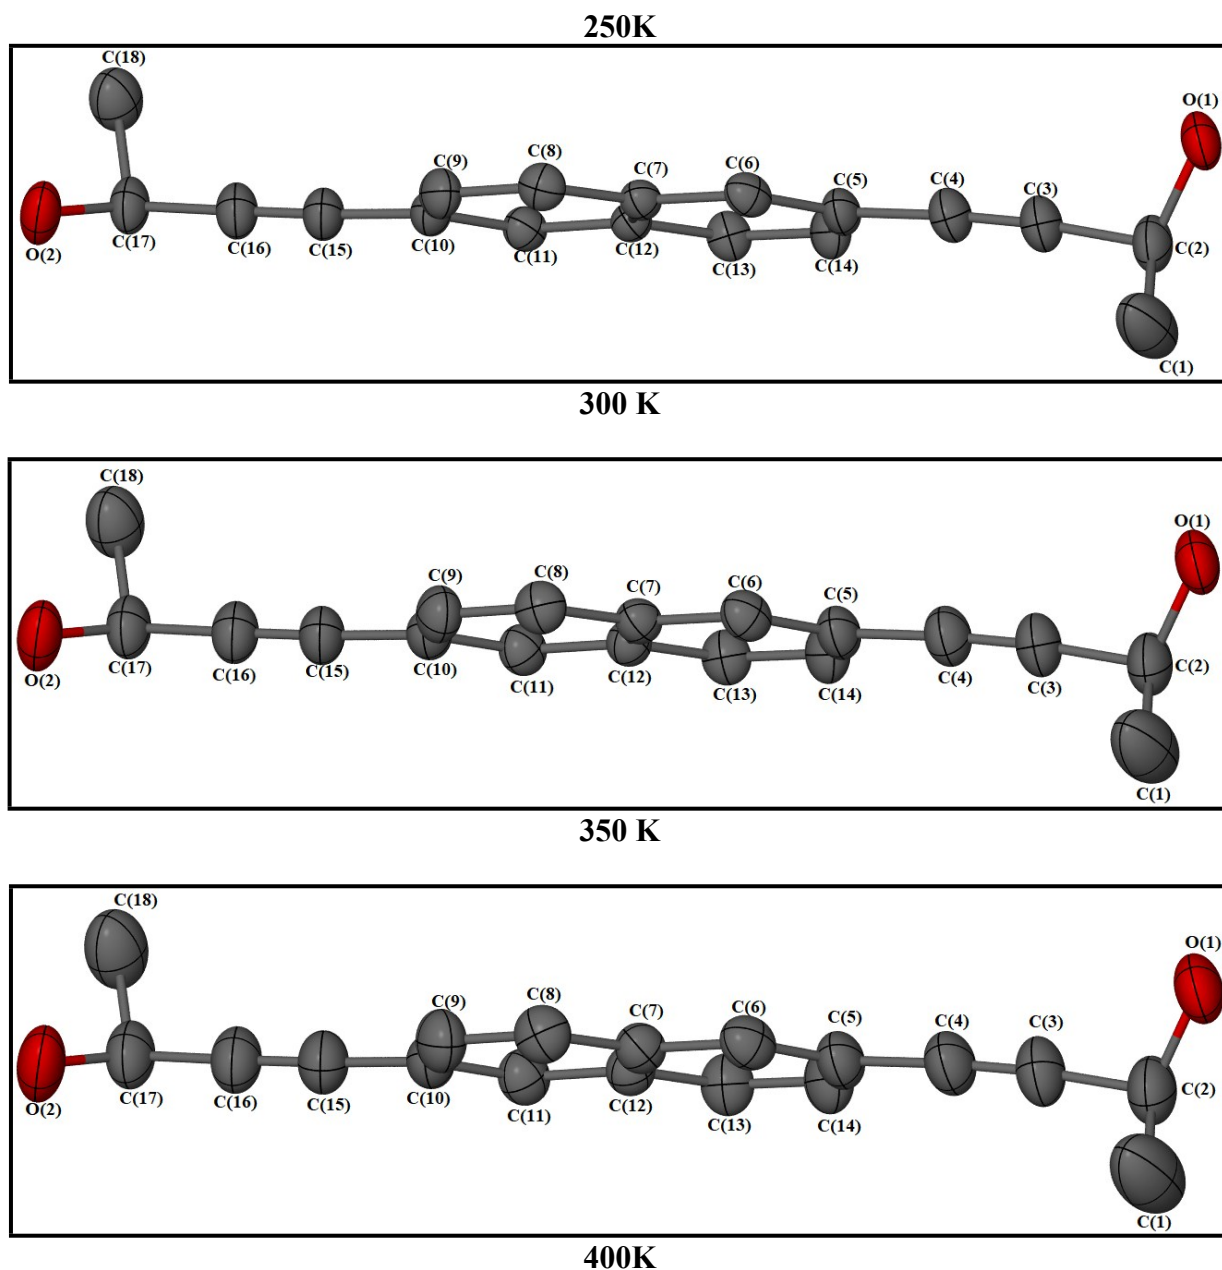

**Figure S15.** Thermal ellipsoid plot of the molecule in the asymmetric unit of the crystal structure of compound **2** at different temperature. Thermal ellipsoid plots are shown in 50 % probability.

## 7. References:

1. K. Sonogashira, Y. Tohda and N. Hagihara, *Tetrahedron Letters*, 1975, **50**, 4467.

2. SAINT; Bruker AXS Inc., Madison, Wisconsin, USA, 2013. SADABS; Bruker AXS Inc., Madison, Wisconsin, USA, 2012.
3. G. M. Sheldrick, SHELXTL v 2014/7; <http://shelx.uni-ac.gwdg.de/SHELX/index.php>.
4. PLATON - A. L. Spek, *Acta Cryst.*, 2009, **D65**, 148.
